# Supplementary material for: ’It stayed there, front and centre’: perspectives on community pharmacy’s contribution to front-line healthcare services during the COVID-19 pandemic in Northern Ireland
Source: PubMed Central journal article supplement — BMJ Open. 2022 Sep 22;12(9):e064549. doi: 10.1136/bmjopen-2022-064549 (PMC9511011; doi:10.1136/bmjopen-2022-064549), 2022-09-22
Supplement: bmjopen-2022-064549.draft_revisions.pdf [file bmjopen-2022-064549.draft_revisions.pdf]

# BMJ Open

BMJ Open is committed to open peer review. As part of this commitment we make the peer review history of every article we publish publicly available.

When an article is published we post the peer reviewers' comments and the authors' responses online. We also post the versions of the paper that were used during peer review. These are the versions that the peer review comments apply to.

The versions of the paper that follow are the versions that were submitted during the peer review process. They are not the versions of record or the final published versions. They should not be cited or distributed as the published version of this manuscript.

BMJ Open is an open access journal and the full, final, typeset and author-corrected version of record of the manuscript is available on our site with no access controls, subscription charges or pay-per-view fees (<http://bmjopen.bmj.com>).

If you have any questions on BMJ Open's open peer review process please email [info.bmjopen@bmj.com](mailto:info.bmjopen@bmj.com)

# BMJ Open

## **“It stayed there, front and centre”: Perspectives on community pharmacy’s contribution to front-line health care services during the COVID-19 pandemic**

|                               |                                                                                                                                                                                                                                       |
|-------------------------------|---------------------------------------------------------------------------------------------------------------------------------------------------------------------------------------------------------------------------------------|
| Journal:                      | <i>BMJ Open</i>                                                                                                                                                                                                                       |
| Manuscript ID                 | bmjopen-2022-064549                                                                                                                                                                                                                   |
| Article Type:                 | Original research                                                                                                                                                                                                                     |
| Date Submitted by the Author: | 09-May-2022                                                                                                                                                                                                                           |
| Complete List of Authors:     | Patterson, Susan M.; Queen's University Belfast Cadogan, Cathal; Trinity College Dublin, Pharmacy<br>Barry, Heather; Queen's University Belfast, School of Pharmacy<br>Hughes, Carmel; Queen's University Belfast, School of Pharmacy |
| Keywords:                     | COVID-19, Quality in health care < HEALTH SERVICES ADMINISTRATION & MANAGEMENT, PRIMARY CARE, QUALITATIVE RESEARCH                                                                                                                    |
|                               |                                                                                                                                                                                                                                       |

SCHOLARONE™  
Manuscripts

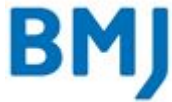

I, the Submitting Author has the right to grant and does grant on behalf of all authors of the Work (as defined in the below author licence), an exclusive licence and/or a non-exclusive licence for contributions from authors who are: i) UK Crown employees; ii) where BMJ has agreed a CC-BY licence shall apply, and/or iii) in accordance with the terms applicable for US Federal Government officers or employees acting as part of their official duties; on a worldwide, perpetual, irrevocable, royalty-free basis to BMJ Publishing Group Ltd ("BMJ") its licensees and where the relevant Journal is co-owned by BMJ to the co-owners of the Journal, to publish the Work in this journal and any other BMJ products and to exploit all rights, as set out in our [licence](#).

The Submitting Author accepts and understands that any supply made under these terms is made by BMJ to the Submitting Author unless you are acting as an employee on behalf of your employer or a postgraduate student of an affiliated institution which is paying any applicable article publishing charge ("APC") for Open Access articles. Where the Submitting Author wishes to make the Work available on an Open Access basis (and intends to pay the relevant APC), the terms of reuse of such Open Access shall be governed by a Creative Commons licence – details of these licences and which [Creative Commons](#) licence will apply to this Work are set out in our licence referred to above.

Other than as permitted in any relevant BMJ Author's Self Archiving Policies, I confirm this Work has not been accepted for publication elsewhere, is not being considered for publication elsewhere and does not duplicate material already published. I confirm all authors consent to publication of this Work and authorise the granting of this licence.

1  
2  
3 ***“It stayed there, front and centre”*: Perspectives on community pharmacy’s contribution to**  
4 **front-line health care services during the COVID-19 pandemic**  
5

6 Susan M. Patterson<sup>1</sup>, Cathal A. Cadogan<sup>2</sup>, Heather E. Barry<sup>1</sup>, Carmel M. Hughes<sup>1\*</sup>  
7

8 <sup>1</sup>School of Pharmacy, Queen’s University Belfast  
9

10 <sup>2</sup>School of Pharmacy and Pharmaceutical Sciences, Trinity College Dublin  
11  
12  
13

14 \*Author for correspondence; Carmel M. Hughes, School of Pharmacy, Queen’s University  
15 Belfast, 97 Lisburn Road, Belfast, BT9 7BL, Northern Ireland. Email: c.hughes@qub.ac.uk  
16  
17  
18  
19  
20  
21  
22  
23  
24  
25  
26  
27  
28  
29  
30  
31  
32  
33  
34  
35  
36  
37  
38  
39  
40  
41  
42  
43  
44  
45  
46  
47  
48  
49  
50  
51  
52  
53  
54  
55  
56  
57  
58  
59  
60

For peer review only

## ABSTRACT

**Objectives:** To explore community pharmacists' and key stakeholders' perspectives and reflections on the community pharmacy workforce's preparedness for, and response to COVID-19, including lessons for future public health crises.

**Design, setting and participants:** Qualitative study using semi-structured interviews (via telephone or online videoconferencing platform), with community pharmacists and a range of key stakeholders (representing other health professions, professional/governing organisations concerned with community pharmacy and patient advocacy groups) from across Northern Ireland. Data were analysed using thematic analysis and constant comparison.

**Results:** Thirty interviews were conducted with community pharmacists (n=15) and key stakeholders (n=15). Four themes were identified: (1) adaptation and adjustment (reflecting how community responded quickly to the need to maintain services and adjusted and adapted services accordingly); (2) the primary point of contact (the continuing accessibility of community pharmacy when other services were not available and role as a communication hub, particularly in relation to information for patients and maintaining contact with other health care professionals); (3) lessons learned (the flexibility of community pharmacy, the lack of infrastructure, especially in relation to information technology, and the need to build on the pandemic experience to develop practice); and (4) planning for the future (better infrastructure which reinforced concerns about poor technology, co-ordination of primary care services and preparing for the next public health crisis). There was a general view that community pharmacy needed to build on what had been learned to advance the role of the profession.

**Conclusions:** The strengths of community pharmacy and its contribution to healthcare services in the COVID-19 pandemic were noted by community pharmacists and acknowledged by key stakeholders. The findings from this study should inform the policy debate on community pharmacy and its contribution to the public health agenda.

### Strengths and limitations of this study

- Recruited a diverse range of participants which provided a holistic and in-depth account
- Rigorous approach to data analysis
- Data saturation was achieved

- Focus on NI may mean that the results reflect the local situation
- Participant demographic characteristics have not been reported due to the limited geographical area from which recruitment took place and the need to preserve anonymity

For peer review only

## INTRODUCTION

The COVID-19 pandemic has had profound effects on the delivery of health care worldwide. In the context of the United Kingdom (UK), hospitals faced unprecedented pressures and waiting lists for non-COVID services are now at an all-time high.<sup>1</sup> Primary care access, notably general practice, was greatly reduced, but community pharmacy largely remained open and accessible to patients and the public.<sup>2</sup>

As part of a larger project examining the community pharmacy workforce's preparedness for, and response to, the COVID-19 pandemic, a telephone-administered questionnaire undertaken with a sample of community pharmacists in Northern Ireland (NI) reported how these pharmacists continued to work in the early phases of the pandemic (from March 2020-December 2020).<sup>3</sup> Practice changed during this time, with essential services being maintained, other services suspended, and new services being implemented. Pharmacies introduced measures to prevent the spread of infection and to protect their staff, and became more involved in public health activities such as 'flu vaccination. Despite feeling unprepared during the first wave (March-May 2020), this changed over time, with pharmacists reporting feeling more prepared when the second wave of infection struck in September 2020. They maintained contact with general practitioner (GP) colleagues and patients (largely by telephone), maintained and updated their professional knowledge, and were enthusiastic about adopting roles that would contribute to future COVID vaccination and testing.<sup>3</sup>

Although this questionnaire provided a valuable snapshot of the community pharmacy experience in the early phases of the pandemic, it did not provide an in-depth understanding of the *lived experience* of community pharmacists. Furthermore, there has been little exploration of other stakeholders' views of community pharmacy's contribution to healthcare during the pandemic. Therefore, the aim of this study was to explore community pharmacists' and other stakeholders' perspectives and reflections on the community pharmacy workforce's preparedness for, and response to COVID-19, including lessons for future public health crises

## METHOD

1  
2  
3 Key informant interviews were conducted with community pharmacists and other  
4 stakeholders (including representatives from patient organisations) in NI. The study has been  
5 reported in accordance with the consolidated criteria for reporting qualitative research  
6 (COREQ) checklist<sup>4</sup> and received ethical approval from the Queen's University Belfast Faculty  
7 of Medicine, Health and Life Sciences Research Ethics Committee (Ref. No. MHLS 21\_21).  
8  
9  
10  
11  
12

### 13 **Setting and population**

14  
15  
16 We sought to recruit key stakeholders for interview including registered community  
17 pharmacists from community pharmacies in NI, representatives of professional and  
18 governing bodies concerned with community pharmacy services in NI (e.g. Department of  
19 Health, Public Health Agency, National Pharmacy Association, and the Pharmaceutical  
20 Society of NI), representatives of other professions such as the Royal College of General  
21 Practitioners, British Medical Association, and representatives of patient advocacy groups,  
22 such as the Patient and Client Council NI, Carers Trust (unpaid carers), Care.org (residential  
23 and nursing homes), and Alzheimer's Society NI.  
24  
25  
26  
27  
28  
29  
30

### 31 **Patient and Public Involvement**

32  
33  
34 Two patient and public involvement (PPI) representatives were recruited to the Study  
35 Advisory Group via the Patient Involvement Enhancing Research (PIER) NI network from the  
36 Health and Social Care Research and Development division. The Study Advisory Group also  
37 included members of the pharmacy profession representing practice, regulation and  
38 professional advocacy, along with a methodological advisor. The Group contributed to the  
39 development of the topic guide (see below), identification of pharmacists to help pilot the  
40 topic guide, with one PPI member participating in a pilot interview one to gauge the clarity of  
41 questions for key stakeholders and duration of the interview.  
42  
43  
44  
45  
46  
47  
48  
49  
50

### 51 **Participant sampling and recruitment**

#### 52 **Sampling and recruitment of community pharmacists**

53  
54  
55 We sought to recruit between 15-20 community pharmacists (with the final sample size  
56 guided by data saturation). Community pharmacists who took part in the telephone  
57 questionnaire study referred to in the Introduction,<sup>3</sup> were asked if they were interested in  
58  
59  
60



1  
2  
3 participating in a follow-up interview. Those who expressed an interest were contacted by  
4 telephone and those who confirmed interest were sent an invitation letter, information  
5 sheet and a consent form. Potential participants were given one week to read and consider  
6 this information. After one week had elapsed, if there were more than 20 pharmacists  
7 willing to participate, the list of pharmacists was to be randomised. The researcher (SP)  
8 contacted them by telephone to arrange a suitable date and time for the interview. These  
9 pharmacists were known to the researcher by virtue of having taken part in the preceding  
10 study.<sup>3</sup>  
11  
12  
13  
14  
15  
16  
17

### 18 Sampling and recruitment of other key stakeholders

19  
20  
21 We sought to recruit between 15-20 other key stakeholders in total (again, with final sample  
22 size determined by data saturation). Convenience sampling was used to recruit a range of  
23 additional stakeholders as key informants and was informed initially by consulting with  
24 members of a Study Advisory Group that was overseeing the conduct of this study. The  
25 research team also identified potential participants through their own professional  
26 networks and experience from previous studies, contacting organisations listed above.  
27 Potential participants were contacted by email in the first instance to gauge interest. Those  
28 who expressed interest were sent an invitation letter, information sheet and a consent  
29 form. Potential participants were given one week to read and consider this information, and  
30 a mutually suitable date and time were arranged for the interview. The researcher would  
31 have been known to some of these key stakeholders, but not all.  
32  
33  
34  
35  
36  
37  
38  
39  
40  
41

### 42 Interview topic guide

43  
44 The interview topic guides (Supplementary Files 1 and 2) were developed based on the  
45 published literature,<sup>5-8</sup> current COVID-19 guidelines at the time,<sup>9</sup> data from a review of the  
46 practice and policy literature,<sup>10</sup> findings from the telephone questionnaire<sup>3</sup> and discussions  
47 within the research team. Five pilot interviews were conducted by SP with members of the  
48 Study Advisory Group and qualified pharmacists from the School of Pharmacy, Queen's  
49 University Belfast to ensure that interview questions were clearly understood by  
50 participants and to estimate the duration of the interview.  
51  
52  
53  
54  
55  
56  
57

### 58 Data collection and analysis

1  
2  
3 To adhere with public health guidelines at the time of the study, all interviews were  
4 conducted by telephone or using an online videoconferencing platform. All interviews were  
5 digitally recorded and no visual images of the participants were captured, and no other  
6 persons were present during the interview. Interviews began with a short briefing during  
7 which the researcher (pharmacist with a PhD who had undertaken qualitative work as part  
8 of her doctorate; had a professional interest in the research topic) introduced herself,  
9 outlined the background to the study and provided an overview of the process that would  
10 be followed during the interview. Verbal consent was obtained and recorded at this stage if  
11 not already received electronically in advance. Following the interview, all participants  
12 (where relevant) were offered a certificate of participation (for Continuing Professional  
13 Development purposes) and an honorarium of £50 in recognition of their time and  
14 inconvenience.

15  
16 The digital recordings were transcribed verbatim, and each transcript was checked against  
17 the original recording for accuracy and anonymised to remove names of people, places and  
18 any other identifying information. Each participant was assigned an alphanumeric code, e.g.  
19 community pharmacist (CP), CP097, key stakeholder (KS), KS03. NVivo® 12 Pro® software  
20 was used for management and analysis of the transcribed data.

21  
22 Reflexive thematic analysis was undertaken concurrently with data collection to determine  
23 data saturation.<sup>11-13</sup> Briefly, this involved initial data familiarisation; generation of initial  
24 codes; identification of themes, reviewing identified themes; defining and naming the  
25 themes, and writing up the findings.

26  
27 Each transcript was analysed independently by two researchers (SP and CMH) using an  
28 inductive and iterative approach. After analysis of the first five transcripts, the research  
29 team met to discuss emerging themes and sub-themes, and a coding framework was  
30 developed based on these. This coding frame was then used for the analysis of all  
31 subsequent transcripts and for re-analysis of the first five transcripts. The use of the  
32 constant comparison method ensured that any new themes arising from the data were  
33 identified and added to the coding frame.<sup>11-14</sup> Any discrepancies between researchers were  
34 resolved by discussion amongst the research team to reach consensus. Final themes were  
35 reviewed and agreed between all authors to enhance reliability. No transcripts were  
36 returned to participants.

## RESULTS

A total of 30 interviews were conducted with community pharmacists (n=15) and key stakeholders (n=15) from July-September 2021. No repeat interviews were conducted. Due to the relatively small population from which participants were recruited, we have not reported any demographic information to ensure anonymity. Interviews took place either by telephone (n=22) or via online videoconferencing (n=8), and lasted between 29-79 minutes (mean=53 minutes). Following analysis, four themes emerged from the data: (1) adaptation and adjustment; (2) the primary point of contact; (3) lessons learned; and (4) planning for the future. An overview of each theme, supported by anonymised quotes, is provided below.

### Theme 1: Adaptation and adjustment

The initial phase of the pandemic (from March 2020) was characterised by adaptation and adjustment on the part of community pharmacists and their staff, who demonstrated high levels of resilience and flexibility. Initially, there was a sense of panic as realisation dawned about the risk of infection to pharmacy staff, with little knowledge about the severity of the disease:

*"This was just a perfect storm of a highly infectious disease that was proven to be very, very dangerous, and the information around it was still evolving."* KS03

The effect of the pandemic was unprecedented, pharmacy staff felt unprepared, and were dealing with a marked increase in workload:

*"...but as for being prepared, I don't think anything would have prepared us for the onslaught that we had for the first few weeks"* CP097

*"The biggest challenge, initially, was the severely increased workload when there was such an absolute surge in prescription numbers."* CP071

As the pandemic continued, community pharmacists demonstrated their ability to adapt, and showed a high degree of flexibility and resilience in order to maintain essential services and medicines supplies. Some key stakeholders commented that these activities relieved

1  
2  
3 the pressure somewhat on other services, including hospital emergency departments and  
4 GPs. Medicines supply was the core service that took priority during the pandemic:  
5  
6

7 *“As entrepreneurs, as innovators, they were able to cope very well with a*  
8 *completely unprecedented situation. They’re always prepared for the unknown.*  
9 *They’re always agile, but they wouldn’t have necessarily been prepared for this.”*  
10  
11  
12

13 KS08

14  
15 *“We get a lot of phone calls and things like that saying, ‘I’m isolating, I need to get*  
16 *my medication’ in which case we would absolutely do our upmost to make sure*  
17 *they got their medication on time, and everything was all correct, everything was*  
18 *there that they’d ordered.”* CP052  
19  
20  
21  
22

23 *“We’ve had to prioritise, and priority is getting people their medicine.”* CP074  
24  
25

26 A key stakeholder representing service users recognised pharmacists’ ethos of ‘keeping calm  
27 and carrying on’:  
28  
29

30 *“For me, pharmacy was one of the shining lights, it stood its ground. It didn’t stand*  
31 *back and didn’t revolt and say, ‘we have to close, we can’t do this, we have to*  
32 *redeploy’. It stayed there, front and centre”* KS10  
33  
34  
35  
36

37 Throughout this period of adaptation and adjustment, participants described the situation  
38 as being emotionally charged with stress, pressure and concern for staff. Community  
39 pharmacists depended on having a strong and flexible staff team to manage the high  
40 workload and patient demands and expectations. Their emotional reactions were evident:  
41  
42  
43

44 *“It would probably be the most challenging professional time of my whole career.*  
45 *Very stressful, very worrying”* CP043  
46  
47  
48

49 There was considerable pressure on pharmacy staff to stay at work; many were worried and  
50 anxious about contracting infection and placing vulnerable family members at risk.

51 However, they demonstrated unwavering commitment to their work and indeed, many  
52 increased their working hours to manage the increased workload and demand from the  
53 public. The pharmacy staff team was considered very important to community pharmacists  
54 which was also recognised by key stakeholders:  
55  
56  
57  
58  
59  
60

1  
2  
3                   *“The number of contractors, employers who have spoken to me and said, you know,*  
4                   *they just are in awe of their staff who have..., just came in when ones (sic) could have*  
5                   *isolated, could have gone on furlough, whatever.”* KS08  
6  
7

8  
9 Throughout the pandemic, community pharmacists maintained essential services and  
10 adapted their services models to provide modified services enabling the continuation of the  
11 critical supply of essential medicines to the public. Pharmacies also implemented  
12 innovations such as the development and provision of modified patient services, e.g.  
13 medicines adherence, prescription collection and delivery services, and a range of new  
14 pandemic services such as flu vaccination, public health advice and an emergency supply  
15 service (whereby a 30-day supply of prescription medicines could be provided to patients  
16 without a prescription) that alleviated the pressure on GP out-of-hours and emergency  
17 department services. There were many positive comments about what worked well:  
18  
19

20                   *“The prescriptions, having to be sent to the pharmacy directly from the doctors, I*  
21                   *think that was a really good change, it allows you to manage workload.”* CP046  
22  
23

24                   *“The other thing is people running out of medication, we’re not supposed to loan*  
25                   *anybody anything without going through the emergency supply route. So that was*  
26                   *good in that they set up the emergency supply service which pharmacists could give*  
27                   *an emergency supply during the pandemic and that worked well and for a change*  
28                   *there wasn’t a pile of paperwork to go with it.”* CP097  
29  
30

## 31 **Theme 2: The first point of contact**

32 In the early stages of the pandemic, it was recognised that community pharmacies were one  
33 of the only entry points to primary healthcare services where the public had direct access to  
34 a healthcare professional:  
35  
36

37                   *“Our roles have changed dramatically I think of what’s expected of us in*  
38                   *the community, definitely. Because we’re the most accessible healthcare*  
39                   *professional.”* CP043  
40  
41

42                   *“They [patients] would have been very quick to say of the reliance that*  
43                   *they had on the community pharmacist. And it was always followed up by*  
44  
45  
46  
47  
48  
49  
50  
51  
52  
53  
54  
55  
56  
57  
58  
59  
60

1  
2  
3 *the comment, "Because we can't get to a doctor, we can't get access to a*  
4 *doctor," you know."* KS12  
5  
6

7 Community pharmacists reported that patients increasingly relied on them as  
8 the first point of contact for advice, either in person or by telephone:  
9  
10

11  
12 *"So, I think that has really changed for us in that we are now their first point of*  
13 *contact really. And even now we are seeing that people are coming to see us even*  
14 *before they phone the doctor and saying, 'Well, what do you think, should I phone*  
15 *the doctor? How should I manage this? What's your opinion?'"* CP046  
16  
17

18  
19  
20 *"We had huge numbers of phone calls, the phones just did not stop. So, there were a*  
21 *lot of people...because of either they were in lockdown, so they felt not coming to the*  
22 *counter was appropriate and maybe phone calls were more appropriate. So, there*  
23 *was a huge amount of phone calls. We ramped up our social media campaigns to try*  
24 *and disseminate some advice."* CP132  
25  
26  
27  
28

29 Community pharmacies also played a key role in information provision, representing the  
30 hub for communication of COVID-19 information directly to patients, other healthcare  
31 professionals and each other. The Public Health Agency in NI rolled out a series of  
32 campaigns on COVID-19 and community pharmacies were central to that communication to  
33 patients. Being in the front line of healthcare resulted in community pharmacists having to  
34 adopt an expanded role, undertaking new services (notably COVID vaccination) and utilising  
35 skills in triage and assessment of patients:  
36  
37  
38  
39  
40  
41

42  
43 *"Now it's a lot more about trying to help people with diagnoses and treatments and*  
44 *signposting them on then to where they really need to be."* CP046  
45  
46

47  
48 *"it's great obviously that pharmacists can vaccinate, you know, obviously with*  
49 *helping with the COVID jabs has been great. Even just being accessible."* CP109  
50  
51

52 *"So, to have done that number [COVID vaccinations] in such a short period of time*  
53 *has been fantastic"* KS01  
54  
55

56 However, being this primary point of contact was sometimes overwhelming, especially with  
57 respect to the amount of information being provided by organisations for onward  
58  
59  
60

1  
2  
3 distribution and dissemination, which was duplicative and sometimes out of date by the  
4 time that it arrived:  
5

6  
7 *“The problem is, you were standing there, and it might have been Wednesday the*  
8 *10<sup>th</sup> and that letter [e.g. advice from Department of Health or Health Board] is dated*  
9 *Tuesday the 2<sup>nd</sup>”.* CP072  
10  
11

12  
13 *“And we would just go in and there would be multiple emails printed off from work,*  
14 *read this, this, this and this at the start of the day. So, I suppose maybe if it could be*  
15 *centralised and come from one source, or fewer sources, it would have made it*  
16 *maybe easier to handle.”* CP046  
17  
18

19  
20 *“We probably were putting out enough information to choke a donkey”* KS01  
21  
22

23  
24 Community pharmacists maintained communication with other members of the primary  
25 health care team, particularly GPs and practice pharmacists, and thought that relationships  
26 in primary care had improved, despite practices remaining largely closed in the early stages  
27 of the pandemic:  
28  
29  
30

31  
32 *“There was a symbiosis as such of trying to help each other and so I would*  
33 *say that it was a lot of good, positive relationships built up”* CP018  
34  
35

36  
37 *“We found working with the practice pharmacists very good during the*  
38 *pandemic. They were a really good resource to have. Because if you*  
39 *maybe couldn't get hold of the GP themselves, the practice pharmacists*  
40 *were really well based to speak to you’* CP046  
41  
42  
43  
44

### 45 **Theme 3: Lessons learned**

46 The importance of community pharmacy in health care was a key lesson. An unintended  
47 consequence of the pandemic was the spotlight placed on community pharmacy,  
48 demonstrating what it could do. The response from community pharmacy during the  
49 pandemic was universally praised, and its reputation was enhanced:  
50  
51  
52

53  
54 *“It's just reinforced how big a part community pharmacists and the community*  
55 *pharmacy team, members of staff, etc. play and how important they are and just to*  
56 *remember that we are really, really important to the people who we treat.”* CP043  
57  
58  
59  
60

1  
2  
3  
4  
5  
6  
7  
8  
9  
10  
*“I think it is well recognised by a range of stakeholders of just how important the community pharmacy contribution during COVID has been, ranging from the Health Minister, and elected, various elected political representatives, through to the Health Service officials, and indeed the public at large.”* KS07

11  
12  
13  
14  
15  
16  
The maintenance of medicines supply was seen as critical (and perhaps somewhat under-appreciated up to this point as it seemed ‘basic’), with recognition that the system could have collapsed without this:

17  
18  
19  
20  
21  
*“The main contribution of community pharmacy, as I said, was maintaining access to medicines, and they did that, and they maintained public access to medicines’* KS03

22  
23  
24  
25  
26  
27  
*“The continuity of supply of medicines. The fact that we were able to keep things going. Generally speaking, bar maybe some isolated incidents, I’m not aware of any, but nobody ended up in hospital because they didn’t have their medication.”* CP071

28  
29  
30  
31  
32  
33  
34  
35  
36  
37  
Through the adaptation and adjustment made to services (and highlighted in Theme 1), services were introduced quickly as a result of the profession’s agility and flexibility, and pharmacists provided important new and modified services that they would want to retain in the future, another key lesson. The retention of these services was supported by key stakeholders:

38  
39  
40  
41  
42  
43  
44  
45  
*“Community pharmacy I think would have a role to play in that, so there’s [sic] not about dispensing more tablets, it’s more about looking at the individual’s needs and how the individual can be supported either individually or in a community context.”*  
KS06

46  
47  
48  
49  
50  
51  
52  
53  
The agility and flexibility (reinforcing Theme 1) of pharmacy staff and their commitment to the care of patients was evident as they stepped up and took more responsibility for frontline patient care, putting previously learned skills into practice. It was noted how much was implemented in a short space of time:

54  
55  
56  
57  
58  
59  
60  
*“I think the biggest thing is how adaptable we are and how quickly we can change things around because there was an absolutely mad two or three weeks back in March/April 2020, where the pharmacies really, really had to dig deep, including the*



1  
2  
3 *staff and all the rest of it to get the job done basically without the system falling*  
4 *down. Because that would have been catastrophic, you know.” CP071*  
5  
6

7 *“The pharmacy profession has really benefited from that in that they [patients] could*  
8 *see what we can actually do. So that would be the biggest change I would have*  
9 *noticed which is good for the profession.” CP52*  
10  
11  
12

13  
14 However, it was recognised that the lack of infrastructure, especially with respect to  
15 information technology (IT), had been problematic during the pandemic, and led to  
16 significant frustration. Participants described the IT system as “antiquated”, and a key lesson  
17 learned from the pandemic was the need for electronic transfer of prescriptions (eTP):  
18  
19  
20

21 *“And just the fact that we’re still chasing paper, you know, at this stage is crazy to be*  
22 *honest. My number one thing would be definitely have electronic prescriptions.”*  
23  
24

25 CP083  
26

27 *“I think what it has shown is that the absolute number one priority is the electronic*  
28 *prescribing, because that gives a sustainable future to what we’ve started to do.”*  
29  
30

31 KS05  
32  
33

34 Other lessons learned included the value of the newly introduced emergency supply service,  
35 the enhanced contribution to health care that community pharmacy could make, and the  
36 need for more formal and recognised integration of community pharmacy into the primary  
37 health care team. Concern was expressed that post-pandemic, community pharmacy’s  
38 contribution would be forgotten, so the opportunity needed to be seized in order to  
39 capitalise on the good will that had been engendered:  
40  
41  
42  
43  
44

45 *“And it would be nice that, you know, we’ve had all the plaudits and the pats on the*  
46 *back with politicians coming out and getting photo opportunities in community*  
47 *pharmacies and such like. It would be nice to get properly paid and to have a*  
48 *contract in place, and us given that respect that is due after all this. I think that is the*  
49 *biggest thing that I would like to see come out of this.” CP018*  
50  
51  
52

53 *“But as the health service normalises, then there is always the risk that pharmacy*  
54 *reverts back to a hidden role.” KS07*  
55  
56  
57  
58  
59

#### 60 **Theme 4: Planning for the future**

1  
2  
3 This final theme linked closely to that presented in Theme 3 in that participants felt that the  
4 lessons learned needed to feed into planning for the post-pandemic future. Areas where  
5 planning was seen as critical were infrastructure, review and co-ordination of service  
6 provision (including the workforce) and preparing for the next emergency.  
7  
8  
9

10  
11 Improvement and upgrading of the current infrastructure were viewed as an urgent priority:  
12

13  
14 *“And I think it’s archaic that we’re using paper prescriptions”* CP074  
15

16  
17 *“So, it’s dealing with those patients who become frustrated with the process basically*  
18 *for repeat prescriptions. To me, it isn’t a very effective use of doctor or even practice-*  
19 *based pharmacist’s time... Yeah, electronic prescription transmission would certainly*  
20 *help with that sort of thing.”* CP071  
21  
22

23  
24 This view also extended to access to patient records by community pharmacists, to facilitate  
25 the development of the clinical role:  
26

27  
28 *“This is about reducing administrative burden, reducing regulatory burden, so that*  
29 *the focus can be on patient services, and patient support, patient advice, patient*  
30 *information, and the safe supply of medicines to patients, and building the services*  
31 *around those contacts that you make whenever medicines are supplied.”* KS07  
32  
33  
34

35  
36 There was overwhelming support for extending the role of community pharmacists and  
37 reviewing the range of patient-facing or clinical services they provide:  
38

39  
40 *“I think the government should maybe pay attention to that [providing clinical*  
41 *services] and the health service would benefit from it dramatically. That’s the way I*  
42 *would love to see pharmacy going.”* CP111  
43  
44  
45

46  
47 Such services included public health initiatives, vaccinations, the maintenance of the new  
48 emergency supply system introduced during the pandemic, and independent prescribing:  
49

50  
51 *“Definitely the vaccination services would be part and parcel of any future service*  
52 *provision.”* CP047  
53

54  
55 *“I actually think... the emergency supplies. I think that they potentially, you know,*  
56 *even post pandemic I think there’s a place for them. I think they [community*  
57 *pharmacists] should be allowed some trust when it comes to, you know, providing*  
58  
59  
60

1  
2  
3 *medication where it's impossible to get a prescription. Because obviously we have*  
4 *the knowledge, and we have the information from their PMR [patient medication*  
5 *records] system to make that call." CP074*  
6  
7

8  
9 *"I would like to think in a future pandemic we would have more independent*  
10 *prescribers in community pharmacy as well, and who could be managing larger*  
11 *formularies of medicines. So, that would help the public access and treatment for*  
12 *specific conditions" KS03*  
13  
14  
15

16  
17 Better coordination between sectors within the profession and interprofessional linkages  
18 were seen as important for the future success of community pharmacy, along with  
19 supporting and enhancing the workforce:  
20  
21

22  
23 *"So, that lack of co-ordination, I think, on the ground between primary care. It was*  
24 *always there, but that hasn't improved with the pandemic, whereas relations with*  
25 *the Board (organisation responsible for commissioning services in NI) have*  
26 *improved." KS08*  
27  
28  
29

30  
31 *"So, the only thing I'd like is somebody to pull a couple of hundred or a few hundred*  
32 *pharmacists available to community pharmacy out of the hat! So, the one thing I*  
33 *definitely don't want to see continuing is the lack of pharmacy cover and staff"*  
34 *CP071*  
35  
36  
37

38  
39 *"And have the remuneration set up that all pharmacies would have two pharmacists,*  
40 *you know. And that was mooted away back 30 or 40 years ago now [researcher's*  
41 *name], but nothing ever happened with that. I mean when you go to the continent*  
42 *the pharmacies are like clinical pharmacies." CP111*  
43  
44  
45  
46

47 Although community pharmacy had demonstrated its agility in dealing with the pandemic,  
48 there was an acknowledgement that future planning for another emergency (pandemic)  
49 had to be much more co-ordinated:  
50  
51

52  
53 *"But I think just having systems in place and, you know, having a plan. A pandemic*  
54 *plan needs to be drawn up and then we need to be trained on it. So, if this happens,*  
55 *we do this, if this happens, we do that. And, you know, a stockpile of PPE [personal*  
56  
57  
58  
59  
60

1  
2  
3 protective equipment] *and stuff like that that could be drawn upon. Because PPE*  
4 *and sanitiser was a big issue at the start as well” CP132*

5  
6  
7 *“If you think about it in terms of services, there needs to be clear trigger points, if you*  
8 *like, for service stand-down, and prioritisation, maybe service stand-up of specific*  
9 *activities that need to be done. So, there’s a learn there in terms of services, and the*  
10 *sort of dynamic commissioning, and decommissioning, if you like, and for community*  
11 *pharmacies just being prepared for that as well.” KS03*

12  
13  
14  
15 *“Planning, in terms of workforce, needs to be better, because we’re just in a difficult*  
16 *place at the minute in terms of adequacy of workforce. So, that needs to be sort of*  
17 *regularised or resolved ahead if there’s another cyclical pandemic.” KS07*

18  
19  
20  
21  
22  
23  
24  
25  
26  
27  
28  
29  
30  
31  
32  
33  
34  
35  
36  
37  
38  
39  
40  
41  
42  
43  
44  
45  
46  
47  
48  
49  
50  
51  
52  
53  
54  
55  
56  
57  
58  
59  
60  
There was a clear view that community pharmacy’s contribution during the pandemic had demonstrated its value and provided momentum for the profession’s trajectory:

30  
31  
32  
33  
34  
35  
36  
37  
38  
39  
40  
41  
42  
43  
44  
45  
46  
47  
48  
49  
50  
51  
52  
53  
54  
55  
56  
57  
58  
59  
60  
*“Pharmacy has indicated very clearly how it can make a contribution in the acute*  
*pandemic phase which has just kind of proved what pharmacies have been saying all*  
*along, and that just needs to be now captured and I think given expression.” CP047*

*“We have a direction of travel here, and we build on what has been achieved.” KS07*

## DISCUSSION

This study has captured the views and perspectives of community pharmacists who worked during the early phases of the pandemic, and those of key stakeholders (some of whom were pharmacists) representing a wide range of constituencies and interests. The findings clearly convey a recognition of community pharmacy’s contribution to maintaining essential health services during the early phases of the pandemic, particularly when other services were not accessible or available. Key stakeholders were very appreciative of what community pharmacy had done, and perhaps one of the unintended consequences of the pandemic was to highlight the role that community pharmacy could play in a post-pandemic health service.

At the beginning of the pandemic, community pharmacy had to adapt and adjust.

Community pharmacist participants recounted the increased workload, uncertainty, a

1  
2  
3 feeling of unpreparedness, fear, and worry. But as was recognised, they demonstrated  
4 agility, resourcefulness, innovation, unceasing commitment and maintained key services  
5 and introduced new and adapted ones. These characteristics were also reflected by Liu et  
6 al.<sup>15</sup> who reported on the experiences of pharmacists in China at the start of the pandemic.  
7 They highlighted the importance of rapid adaptability and resiliency of individual  
8 practitioners to rapidly changing circumstances of the pandemic.<sup>15</sup> Interviews with primary  
9 care professionals (largely GPs and nurses) from eight European countries also revealed a  
10 rapid transformation of services with the onset of COVID-19, in the context of uncertainty  
11 about diagnosis, management and treatment.<sup>16</sup>

12  
13  
14  
15  
16  
17  
18  
19  
20  
21  
22  
23  
24  
25  
26  
27  
28  
29  
30  
31  
32  
33  
34  
35  
36  
37  
38  
39  
40  
41  
42  
43  
44  
45  
46  
47  
48  
49  
50  
51  
52  
53  
54  
55  
56  
57  
58  
59  
60  
Much of what community pharmacists did during the early stages of the pandemic reflected  
a Pharmacy Emergency Preparedness and Response Framework developed by Aruru et al.<sup>17</sup>  
consisting of five components - emergency preparedness and response, operations  
management, patient care and population health interventions, public health, and  
continuing professional education. An important part of this Framework specifically refers to  
the importance of preparation and flexibility in emergency circumstances to ensure  
effective responses and worker safety.<sup>17</sup> Community pharmacy activities as reported in this  
study exemplified these components. A scoping review by Costa et al.<sup>18</sup> outlined current  
practices on COVID-19 reported by pharmacy professional associations from across 32  
countries. Almost all preventive measures to reduce health risks had been provided in most  
countries. Other frequent interventions reflected preparedness for stockpiling, increased  
demand for services and products, and important patient care interventions beyond the  
dispensing role. In view of COVID-19, changes to regulation and legislation enabled services  
to be delivered that improved access to medicines and relevant products, patient screening  
and referral including point-of-care antigen testing, support to vulnerable patients, and  
COVID-19 vaccination.<sup>18</sup> Again, many of these activities were undertaken by pharmacists in  
the present study and were recognised by participating stakeholders.

Community pharmacy was inundated with patients seeking help due to the lack of  
availability of other services which has been reported in other UK-based studies.<sup>8</sup>  
Pharmacists were the first point of contact, and indeed, sometimes the only point of  
contact, demonstrating the critical role that community pharmacy played in delivery of  
primary care during the pandemic. These observations are consistent with the comments

1  
2  
3 from Traynor<sup>19</sup> who stated that “pharmacists matter in a pandemic response”, highlighting  
4 how pharmacies and pharmacists could and should serve a more useful role in society-wide  
5 pandemic preparedness. It was recognised that in addition to providing vaccinations,  
6 community pharmacies could become decentralised primary care service hubs, triaging  
7 patients prior to accessing family doctors or emergency rooms, and providing more direct  
8 hands-on support for medication therapy management at the patient and community  
9 level.<sup>19</sup> And based on our interview data, this appeared to happen in the early stages of the  
10 pandemic, with community pharmacy becoming that main point of contact. Indeed, these  
11 findings are consistent with a 2020 Report from the Organisation for Economic Co-operation  
12 and Development (OECD) which identified pharmacists as primary care providers in its  
13 definition of primary health care.<sup>20</sup> The Report outlined that there is ample scope for further  
14 developing the role of pharmacists and the need to develop more effective collaboration  
15 with the GPs and other healthcare professionals.

16  
17  
18 As a result, pharmacists reported that they perceived that patients now viewed them in a  
19 different light and were asking for advice and intervention from community pharmacists  
20 that may have been previously given by other sources, e.g. general practice. They  
21 disseminated information on COVID and participated in vaccination campaigns. But this also  
22 led to a surge in workload which was difficult to manage at times. In addition, by the time  
23 information was received, it was often out of date, and there was a recognition from some  
24 key stakeholders that there was probably too much information disseminated. This was also  
25 reported by Austin and Gregory<sup>21</sup> who interviewed 21 pharmacists based in Ontario,  
26 Canada, with a view to exploring resilience during the pandemic. These pharmacists noted  
27 the early stages of the pandemic as being a time of information overload and confusion.  
28 Most participants in the Canadian study reported increasing reliance on the websites of, and  
29 emails from, regulatory bodies and professional associations as their primary source of  
30 information. However, there was also frustration that communication from these  
31 organisations was often ambiguous and unclear.<sup>21</sup> A Belgian study reporting on interviews  
32 with GPs, highlighted an over-supply of information on COVID-19 which was also  
33 contradictory.<sup>22</sup> Wanat et al.<sup>16</sup> documented that primary care participants often felt  
34 overwhelmed with information that was constantly changing and coming from multiple  
35 sources.

1  
2  
3 The experience of working in the pandemic gave participants the opportunity to consider  
4 lessons learned. These lessons highlighted the importance of community pharmacy and its  
5 essential role in maintaining medicines supply, services that should be retained post-  
6 pandemic, and the adaptability and flexibility of community pharmacists and staff to meet  
7 demands. But there was also recognition as to the limits of what could be done largely due  
8 to outdated infrastructure, notably information technology (IT). Participants expressed  
9 frustration at antiquated systems, largely paper-based, and called for investment in better  
10 systems. Austin and Gregory<sup>21</sup> in their interview study noted that pharmacy organisations  
11 that had previously invested in technology were much better able to manage the surge in  
12 workload than those without such systems. In this present study, there was strong support  
13 for a change to IT services.

14  
15 Finally, while the contribution of community pharmacy was universally recognised, there  
16 were concerns that the lessons learned and experience gained could be quickly forgotten in  
17 the post-pandemic world. There was a view that the goodwill and recognition of pharmacy  
18 and its contribution needed to be exploited in order to plan for the future, and instigate  
19 much needed change. And indeed, many of the lessons and experience fed into planning for  
20 the future which was the final theme. There was reinforcement of needing better  
21 infrastructure (IT being a case in point), better coordination and review of services  
22 (including workforce) and planning for the next emergency. This call for better planning was  
23 echoed by Wanat et al.<sup>16</sup> Community pharmacists were very willing to assume a much more  
24 prominent public health role, and to be a primary point of contact as they had been during  
25 the pandemic. There was also support for a prescribing role and better co-ordination across  
26 other health sectors, the need for more staffing, and much better planning and training for  
27 the next pandemic. Again, this reflects what other community pharmacy studies have  
28 reported, with a particular emphasis on the necessary infrastructure.<sup>21</sup> Indeed, at a broader  
29 policy level, it has been highlighted in a report from the King's Fund that 'the road to  
30 renewal' in the post-pandemic health and care system has to focus on a number of key  
31 areas including workforce, digital changes and the relationship between communities and  
32 public services.<sup>23</sup> These priorities reflect those for community pharmacy.

33  
34  
35 The strengths and limitations of this study should be acknowledged. We recruited a diverse  
36 range of participants who had had direct experience of delivering or planning services over  
37  
38  
39  
40  
41  
42  
43  
44  
45  
46  
47  
48  
49  
50  
51  
52  
53  
54  
55  
56  
57  
58  
59  
60

1  
2  
3 the course of the pandemic. The views of key stakeholders provided a more external  
4 perspective to that of community pharmacists, but largely reinforced the views of the latter.  
5 We attained data saturation with the sample recruited, and the findings reinforced those  
6 from a preceding study,<sup>3</sup> but through the interviews, more in-depth discussion was possible  
7 which provided a more nuanced understanding of the issues. However, all participants were  
8 recruited from the same geographical region, perhaps limiting transferability of findings. It  
9 should be noted that other studies conducted in the community pharmacy sector which  
10 have evaluated the impact of the pandemic have reported complementary findings and  
11 themes.<sup>8 15 21</sup> Due to the close-knit nature of health care delivery and policy organisation in  
12 Northern Ireland, we decided not to report any participant characteristics e.g. gender,  
13 professional role, in order to maintain anonymity.

14  
15  
16  
17  
18  
19  
20  
21  
22  
23  
24 The COVID-19 pandemic has had a profound effect on healthcare delivery across the world.  
25 Community pharmacy was very much part of the front-line of services that remained  
26 accessible to patients. The data generated in this study have highlighted how the profession  
27 responded under the most difficult of circumstances, but have also demonstrated on what  
28 can be derived from the experience in order to inform future planning for the profession.  
29 Moynihan et al.<sup>24</sup> in their systematic review on the impact of the COVID-19 pandemic on  
30 healthcare service utilisation, suggested that post-pandemic recovery provided a rare  
31 opportunity for systematic changes in healthcare systems. This very much reflects the  
32 community pharmacy scenario in which participants also wanted to use the pandemic  
33 experience to progress the role of community pharmacy in a strategic way, and as conveyed  
34 by the findings in this study, community pharmacists were willing and enthusiastic to deliver  
35 on such strategies.

36  
37  
38  
39  
40  
41  
42  
43  
44  
45  
46  
47  
48  
49 **Acknowledgements:** The authors wish to acknowledge the contribution of all participants to  
50 this study. We also wish to thank the members of the Study Advisory Group for their advice  
51 and support and those who helped to pilot the topic guides.

52  
53  
54  
55  
56  
57 **Contributors:** Conception/design: CAC, HEB, CMH; Acquisition, analysis or interpretation of  
58 the data: SMP, CAC, HEB, CMH; Manuscript drafting, revision, approval: SMP, CAC, HEB,  
59  
60



1  
2  
3 CMH. Overall guarantors: CMH. The guarantor accepts full responsibility for the work and/or  
4 the conduct of the study, had access to the data and controlled the decision to publish.  
5  
6  
7

8  
9 **Funding:** This work was funded by the Health and Social Care Research and Development  
10 Division of the Public Health Agency, NI, under its COVID-19 Rapid Response Funding Call  
11 (Ref. No. COM/5601/20). The content or views expressed are those of the  
12 authors/presenters and do not necessarily reflect the official views of the HSC R&D Division.  
13  
14  
15

16  
17  
18 **Competing interests:** None to declare  
19

20  
21 **Patient consent for publication:** Not required  
22

23  
24  
25 **Data availability statement:** Data are available upon reasonable request  
26

27  
28  
29 **Ethics statement:** This study received ethical approval from the Queen's University Belfast  
30 Faculty of Medicine, Health and Life Sciences Research Ethics Committee (Ref. No. MHLS  
31 21\_21).  
32  
33  
34

## 35 36 REFERENCES

- 37  
38 1. NHS England and NHS Improvement. Delivery plan for tackling the COVID-19 backlog  
39 of elective care. February 2022. Available at  
40 [https://www.england.nhs.uk/coronavirus/wp-](https://www.england.nhs.uk/coronavirus/wp-content/uploads/sites/52/2022/02/C1466-delivery-plan-for-tackling-the-covid-19-backlog-of-elective-care.pdf)  
41 [content/uploads/sites/52/2022/02/C1466-delivery-plan-for-tackling-the-covid-19-](https://www.england.nhs.uk/coronavirus/wp-content/uploads/sites/52/2022/02/C1466-delivery-plan-for-tackling-the-covid-19-backlog-of-elective-care.pdf)  
42 [backlog-of-elective-care.pdf](https://www.england.nhs.uk/coronavirus/wp-content/uploads/sites/52/2022/02/C1466-delivery-plan-for-tackling-the-covid-19-backlog-of-elective-care.pdf) [Accessed March 7th 2022]  
43
- 44 2. Parkhurst C, Purewal GS, Donyai P. Community pharmacy and COVID-19-the unsung  
45 heroes on our high streets. *J Patient Exp* 2020;7:282-284  
46
- 47 3. Patterson SM, Cadogan CA, Barry HE, et al. A survey of community pharmacy  
48 workforce's preparedness for, and response to, the COVID-19 pandemic in Northern  
49 Ireland. *Int J Pharm Pract* 2022;30 (S1):i15-i16  
50
- 51 4. Tong A, Sainsbury P, Craig J. Consolidated criteria for reporting qualitative research  
52 (COREQ): a 32-item checklist for interviews and focus groups. *Int J Qual Health Care*  
53 2007;19:349-57  
54
- 55 5. Adam J, Khazaka M, Charikhi F, et al. Management of human resources of a  
56 pharmacy department during the COVID-19 pandemic: Take-aways from the first  
57 wave. *Res Soc Admin Pharm* 2021;17:1990-1996  
58  
59  
60

6. Koster ES, Philbert D, Bouvy ML. Impact of the COVID-19 epidemic on the provision of pharmaceutical care in community pharmacies. *Res Soc Admin Pharm* 2021;17:2002-2004
7. Visacri MB, Figueiredo IV, Lima TM. Role of pharmacist during the COVID-19 pandemic: A scoping review. *Res Soc Admin Pharm* 2021;17:1799-1806
8. Zaidi STR, Hasan SS. Personal protective practices and pharmacy services delivery by community pharmacists during COVID-19 pandemic: results from a national study. *Res Soc Admin Pharm* 2021;17:1832-1837
9. Department of Health. COVID-19 Guidance 2021. Available at: [COVID-19 - Guidance | Department of Health \(health-ni.gov.uk\)](#) and [Guidance for HSC staff, healthcare workers and care providers | HSC Public Health Agency \(hscni.net\)](#) [Accessed January 2021]
10. Barry HE, Cadogan CA, O'Reilly E, et al. Changes to community pharmacy practice during the COVID-19 pandemic: a cross-country documentary analysis. *Int J Pharm Pract* 2022;30(S1):i21-i22
11. Green J, Thorogood N. Qualitative methods for health research. 3rd ed., London: Sage Publications. 2014
12. Braun V, Clarke V. Using thematic analysis in psychology. *Qual Res Psychol* 2006;3:77-101.
13. Braun V, Clarke V. Reflecting on reflexive thematic analysis. *Qual Res Sport, Exerc Health* 2019;11:589-597
14. Austin Z, Sutton J. Research methods in pharmacy practice. Methods and applications made easy. 1<sup>st</sup> Ed, China: Elsevier Health Sciences. 2019. ISBN:978-0-70-207-426-4
15. Liu S, Luo P, Tang M et al. Providing pharmacy services during the coronavirus pandemic. *Int J Clin Pharm* 2020;42:299-403
16. Wanat M, Hoste M, Gobat N, Anastasaki M, Bohmer F, Chlabicz S, et al. Transformation of primary care during the COVID-19 pandemic. *Br J Gen Pract* 2021;71:e634-e642
17. Aruru M, Truong HA, Clark S. Pharmacy Emergency Preparedness and Response (PEPR): a proposed framework for expanding pharmacy professionals' roles and contributions to emergency preparedness and response during the COVID-19 pandemic and beyond. *Res Soc Admin Pharm* 2021;17:1967-1977
18. Costa S, Romao M, Mendes M, et al. Pharmacy interventions on COVID-19 in Europe: Mapping current practices and a scoping review. *Res Soc Admin Pharm* [doi.org/10.1016/j.sapharm.2021.12.003](https://doi.org/10.1016/j.sapharm.2021.12.003)
19. Traynor K. Pharmacists matter in pandemic response. *Am J Health-Syst Pharm* 2008;65(19):192-1793
20. OECD. *OECD Health Policy Studies*. Realising the Potential of Primary Health Care; 2020. <https://doi.org/10.1787/a92adee4-en>.
21. Austin Z, Gregory P. Resilience in the time of pandemic: the experience of community pharmacists during COVID-19. *Res Soc Admin Pharm* 2021;17:1867-1875

- 1  
2  
3  
4  
5  
6  
7  
8  
9  
10  
11  
12  
13  
14  
15  
16  
17  
18  
19  
20  
21  
22  
23  
24  
25  
26  
27  
28  
29  
30  
31  
32  
33  
34  
35  
36  
37  
38  
39  
40  
41  
42  
43  
44  
45  
46  
47  
48  
49  
50  
51  
52  
53  
54  
55  
56  
57  
58  
59  
60
22. Verhoeven V, Tsakitzidis G, Philips H, et al. Impact of the COVID-19 pandemic on the core functions of primary care: will the cure be worse than the disease? A qualitative interview study in Flemish GPs. *BMJ Open* 2020;10:e039674. doi:10.1136/bmjopen-2020-039674
23. Charles A, Ewbank L. The road to renewal: five priorities for health and care. The King's Fund, 2021. Available at <https://www.kingsfund.org.uk/publications/covid-19-road-renewal-health-and-care> [Accessed March 15<sup>th</sup> 2022]
24. Moynihan R, Snaders S, Michaleff ZA, et al. Impact of COVID-19 pandemic on utilisation of healthcare services: a systematic review. *BMJ Open* 2021;11:e045343. doi:10.1136/bmjopen-2020-045343

For peer review only

A mixed methods study of the community pharmacy workforce's preparedness for, and response to, the COVID-19 pandemic

## COMMUNITY PHARMACIST INTERVIEW TOPIC GUIDE

### Introduction

*"Hello, my name is Susan Patterson and I am a researcher from the School of Pharmacy, Queen's University Belfast. Thank you very much for making the time to speak with me today.*

*Have you had a chance to read through the information sheet that was sent out to you? Would you like me to read you a short summary? Are there any questions that you would like to ask me before we start?"*

Optional section to read if the pharmacist hasn't read the participant information sheet

*"In this research project, we are interested in finding out about the community pharmacy workforce's preparedness for, and response to, the COVID-19 pandemic. In the first part of this project, we reviewed various documents relating to structural changes to community pharmacy practice (i.e. infrastructure, funding/resourcing, legislation, policies and guidelines) in Northern Ireland in preparation for and/or in response to the COVID-19 pandemic. In the second part we contacted 130 community pharmacists in Northern Ireland by telephone and asked them to complete a short questionnaire about how they prepared for and responded to the COVID-19 pandemic. You participated in this stage and expressed an interest in taking part in the next stage of the study. Now we are speaking to a range of key stakeholders to further explore perspectives and reflections on the community pharmacy workforce's preparedness for, and response to COVID-19, including lessons for future public health crises. We will be exploring the views and experiences of community pharmacists in more detail and will also be interviewing representatives of patients, the pharmacy and medical professions, policy makers and service commissioners."*

Explaining what will happen in the interview and afterwards

*"I will be recording the interview on a digital recorder, to ensure that we have an accurate and detailed record of what you say. The recording will be saved on a password-protected computer and only those immediately involved in the research study and a transcriber (who will sign a confidentiality agreement) will be able to listen to it. The recording will be typed up word-for-word and any names, locations, or anything else that could identify you will be removed so that the information is anonymous. After we have conducted interviews with all participants, we will analyse the information within the research team. The interview should last approximately 40 minutes. You are free to stop*

1  
2  
3 *the interview and/or recording at any point. If there are any questions that you would prefer not to*  
4 *answer, just let me know and we can move on to the next question.”*

#### 6 7 **Consent**

8 *“Before we start, I need to obtain your consent to ensure that you understand what the study involves;*  
9 *that anything you say will be kept completely confidential, that you will not be identified in any way,*  
10 *and also that you are happy for the interview to be recorded.”*

11  
12  
13  
14  
15  
16 **If the interview is conducted in person:** *“Can you please read through the consent form (Appendix*  
17 *1) and initial each box to indicate that you understand and agree with each statement, before signing*  
18 *and dating the form? There are two copies: you will keep one of them and I will keep the other for our*  
19 *records.”*

20  
21  
22  
23 **[Turn the digital recorder on]**

24  
25 **[Consent form – see Appendix 1]**

26  
27  
28  
29  
30 **If the interview is conducted by telephone:** *“I will now read you a series of statements about the*  
31 *study (Appendix 1) which I would like you to respond to with either “Yes” or “No”. I will audio-record*  
32 *and note your responses on the consent form.”*

- 1  
2  
3  
4  
5  
6  
7  
8  
9  
10  
11  
12  
13  
14  
15  
16  
17  
18  
19  
20  
21  
22  
23  
24  
25  
26  
27  
28  
29  
30  
31  
32  
33  
34  
35  
36  
37  
38  
39  
40  
41  
42  
43  
44  
45  
46  
47  
48  
49  
50  
51  
52  
53  
54  
55  
56  
57  
58  
59  
60
- How would you sum up your experience of the pandemic while working in community pharmacy?
    - How prepared did you feel?
    - How did your experience change over time?
    - What worked well?
    - What worked less well?
  - What do you think were the biggest challenges that the community pharmacy profession has faced during the pandemic?  
(Prompts<sup>1</sup>: protection of pharmacy workforce, concerns about staff illness, staff isolation, risk of pharmacy closure, financial difficulties, essential medicines stock shortages, public panic, GP closure, provision of COVID advice)
  - Did the nature of your interactions with the public change during the pandemic?
    - How do you think the public perceived community pharmacists during the pandemic?
    - How do you think public expectations of community pharmacy could be managed in a future pandemic?
  - Responses from the telephone questionnaire indicated that during the current pandemic, some pharmacists had some negative experiences with the public. What was your experience?  
(Prompts: aggressive behaviour, panic/anxiety, stockpiling)
    - Were there any common issues or problems that arose?
    - What was the impact on you and your staff?
    - Do you have any thoughts on how this could be avoided in a future pandemic?  
(Prompts: communication with GPs, advance information provided to the public re. changes to the Rx process)
  - Do you think the public received sufficient information about COVID-19 from community pharmacy?  
(Prompts: infection control, symptoms and usual course of the disease, testing, contact tracing, seeking help, accessing medicines)

---

<sup>1</sup> The researcher will rephrase the question if necessary and not verbalise these as far as possible to avoid leading the interviewee

- 1  
2  
3  
4  
5  
6  
7  
8  
9  
10  
11  
12  
13  
14  
15  
16  
17  
18  
19  
20  
21  
22  
23  
24  
25  
26  
27  
28  
29  
30  
31  
32  
33  
34  
35  
36  
37  
38  
39  
40  
41  
42  
43  
44  
45  
46  
47  
48  
49  
50  
51  
52  
53  
54  
55  
56  
57  
58  
59  
60
- How do you think the core role of the community pharmacist changed over the course of the pandemic?
  - In what areas do you think community pharmacy has made the biggest contributions to the healthcare response to COVID-19?
  - Do you think that there are any areas where community pharmacy could have been more actively involved or made a greater contribution during the healthcare response to COVID-19?
    - What would have been needed to facilitate this?
  - Can you tell me about any changes to your practice/services as a pharmacist that occurred as a result of the pandemic that you would like to see remain in place?  
(Prompt: Flu vaccination services, COVID-19 vaccination services, text alerts, change in methods of service delivery to maintain social distance e.g. video consultations, telephone calls and medicines pick up)
    - What would you **not** like to see remain in place?
  - What were your experiences of working with local healthcare professionals across the NHS during the pandemic?
    - How did they perceive community pharmacists?
    - Did relationships change? (If so, in what way?)
  - How do you think the pandemic will affect your working relationship with local healthcare professionals going forward?
  - How do you think healthcare professionals' expectations of community pharmacy could be managed in a future pandemic?
  - COVID-19-related information for pharmacists on a number of topics, i.e. clinical, business and financial matters, came from several different sources during the course of the pandemic, e.g. BSO website, HSCB e-mails, Department of Health letters, CPNI. What did you think about the COVID-19 information that was available to you? (Prompts: Quality, volume, frequency of distribution, evidence base, source)
    - What areas were covered well?
    - Was there anything in terms of information provision that could have been done differently?

- How helpful was the business support you received from professional bodies / government departments? [*may not be relevant to employee pharmacists*] (Prompt e.g. financial support, permission to change opening hours, temporary pharmaceutical register)
  - Did you receive the support that you needed? (If not, can you tell me more about this?)
  - What was good about the support you received?
  - *For employee pharmacists*: Were there any areas of support you felt were lacking for you as an employee pharmacist?
  
- How do you think community pharmacy could prepare for a future pandemic or health care crisis? (Prompts: Business continuity / staffing – cross sectoral working, Communication strategies, Advance disaster planning, Guidance for pharmacy contractors on how to manage during a pandemic, Training – community pharmacists + staff?, Training in locality – multidisciplinary? Modernising prescription medicines processes and structures)
  
- How much autonomy should there be for healthcare professionals such as community pharmacists to exercise their own professional judgement in the decisions or actions that they take during an emergency situation such as a pandemic? (Prompts: controlled drugs storage, emergency medicines legislation)
  
- What has been the single biggest learning point for you about your role as a community pharmacist from the pandemic so far?

### Closing the interview

*“That brings us to the end of the interview.*

*Is there anything else about community pharmacy and the ongoing COVID-19 pandemic that you feel has not been covered or that you would like to discuss before we finish up?*

*Do you have any additional comments you would like to make as to the content of the interview or how it went?*

*Thank you very much for making the time to speak with me today.”*

**[Turn the digital recorder off]**



## Appendix 1: Interview participant consent form

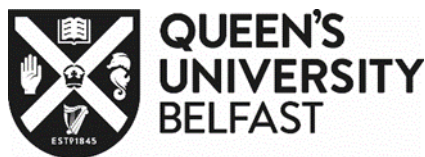

School of Pharmacy

Medical Biology Centre  
97 Lisburn Rd  
Belfast BT9 7BL  
Tel: 028 90972007  
Fax: 028 90247794

**INTERVIEW PARTICIPANT CONSENT FORM**STUDY ID 

**Study Title: The community pharmacy workforce's preparedness for, and response to, the COVID-19 pandemic**

Please initial box

1. I confirm that I have read, or had read to me, and understand the information sheet dated 10/02/2021 (version 1.0) for the above study. I have had the opportunity to ask questions, and these have been answered fully.

2. I understand that my participation is completely voluntary and that I am free to withdraw at any time, without giving any reason and without my legal rights being affected.

3. I understand, and agree to, the interview being digitally audio recorded.

4. I understand that direct quotations from the interview may be used in reports and papers, but that confidentiality and anonymity will be maintained, and it will not be possible to identify me from any publications.

Community Pharmacists Interview

Topic Guide

Study ID 

5. I understand that the researcher may share the pseudonymised audio-recordings with a transcription company and that the company will destroy the recording as soon as the transcription has been checked.

6. I understand that what is discussed during the interview is confidential.

7. I understand that the study is being conducted by researchers from Queen's University Belfast and that my personal information (including consent forms) will be held securely on University premises (in the School of Pharmacy) and handled in accordance with the provisions of the General Data Protection Regulation (2018).

8. I agree to take part in the above study.



---

**Name of Participant**

---

**Date**

---

**Signature**

(Please print)

SUSAN PATTERSON

---

**Name of Researcher**

---

**Date**

---

**Signature**

(Please print)

***When completed: A signed copy of this form can be returned by e-mail to [susan.patterson@qub.ac.uk](mailto:susan.patterson@qub.ac.uk) or by post to Dr Susan Patterson, at the address above. Please retain a copy for your personal records.***

***Thank you for your participation in this research.***

A mixed methods study of the community pharmacy workforce's preparedness for, and response to, the COVID-19 pandemic

## OTHER KEY STAKEHOLDERS: INTERVIEW TOPIC GUIDE

### Introduction

*Hello, my name is Susan Patterson, and I am a researcher from the School of Pharmacy, Queen's University Belfast. Thank you very much for making the time to speak with me today.*

*Have you had a chance to read through the information sheet that was sent out to you? Would you like me to read you a short summary? Are there any questions that you would like to ask me before we start?"*

### Optional section to read if the participant hasn't read the information sheet

*"In this research project, we are interested in finding out about the community pharmacy workforce's preparedness for, and response to, the COVID-19 pandemic. In the first part of this project, we reviewed various documents relating to structural changes to community pharmacy practice (i.e. infrastructure, funding/resourcing, legislation, policies and guidelines) in Northern Ireland in preparation for and/or in response to the COVID-19 pandemic. In the second part, we contacted 130 community pharmacists in Northern Ireland by telephone and asked them to complete a short questionnaire about how they prepared for and responded to the COVID-19 pandemic. Now we are speaking to a range of key stakeholders to further explore perspectives and reflections on the community pharmacy workforce's preparedness for, and response to COVID-19, including lessons for future public health crises. We will be exploring the views and experiences of community pharmacists in more detail and will also be interviewing representatives of patients, the pharmacy and medical professions, policy makers and service commissioners."*

### Explaining what will happen in the interview and afterwards

*"I will be recording the interview on a digital recorder, to ensure that we have an accurate and detailed record of what you say. The recording will be saved on a password-protected computer and only those immediately involved in the research study and a transcriber (who will sign a confidentiality agreement) will be able to listen to it. The recording will be typed up word-for-word and any names, locations, or anything else that could identify you will be removed so that the information is anonymous. After we have conducted interviews with all of the other participants, we will analyse the information within the research team. The interview should last approximately 40 minutes. You are free to stop the interview and/or recording at any point. If there are any questions that you would prefer not to answer, just let me know and we can move on to the next question."*

## Consent

*“Before we start, I need to obtain your consent to ensure that you understand what the study involves; that anything you say will be kept completely confidential, that you will not be identified in any way, and also that you are happy for the interview to be recorded.”*

**If the interview is conducted in person:** *“Can you please read through the consent form and initial each box to indicate that you understand and agree with each statement? There are two copies: you will keep one of them and I will keep the other for our records.”*

**[Turn the digital recorder on]**

**[Consent form – see Appendix 1]**

**If the interview is conducted by telephone:** *“I will now read you a series of statements about the study which I would like you to respond to with either “Yes” or “No”. I will audio-record and note your responses on the consent form.”*

### Demographic information

*"I would like to start by asking you a few questions about yourself and I will note the answers on this form [show participant the demographic details form]. This form will help us describe who has taken part in this study, but you will not be identified in any way."*

[If it is a telephone interview, the text above will be amended to take account of this.]

#### 1. Can I confirm the gender you identify as?

Female

Male

Prefer not to disclose

Other (please specify)

Other: \_\_\_\_\_

#### 2. Which of the following categories includes your age?

&lt;25

25 - 34

35 - 44

45 - 54

55 - 64

≥65

#### 3. What is your occupation?

Administrative Pharmacy/ Doctor / Patient representative / Other please specify

\_\_\_\_\_

#### 4. How many years have you been working in your current role?

≤5

6 – 10

11 – 15

≥15

- 1  
2  
3  
4  
5  
6  
7  
8  
9  
10  
11  
12  
13  
14  
15  
16  
17  
18  
19  
20  
21  
22  
23  
24  
25  
26  
27  
28  
29  
30  
31  
32  
33  
34  
35  
36  
37  
38  
39  
40  
41  
42  
43  
44  
45  
46  
47  
48  
49  
50  
51  
52  
53  
54  
55  
56  
57  
58  
59  
60
- Focusing on your role as [*insert whatever their role is*], can you tell me about how you would sum up your experience of community pharmacy during the pandemic?
    - How prepared do you think community pharmacists were as the pandemic started?
    - Did your experience with community pharmacy change over time?
    - What worked well?
    - What worked less well?
  
  - In your current role, how has the nature of your interaction with community pharmacists changed as a result of the pandemic?
  
  - What do you think were the biggest challenges that community pharmacy has faced during the pandemic?  
(Prompts<sup>1</sup>: protection of pharmacy workforce, concerns about staff illness, staff isolation, risk of pharmacy closure, financial difficulties, essential medicines stock shortages, public panic, GP closure, provision of COVID advice)
  
  - In what areas do you think community pharmacy has made the biggest contributions to the healthcare response to COVID-19?
  
  - In what areas do you think community pharmacy could have been more actively involved or made a greater contribution during the healthcare response to COVID-19?
    - What would have been needed to facilitate this?
  
  - How do you think the role of the community pharmacist has changed as a result of the pandemic?
    - Do you view community pharmacists differently now compared to pre-pandemic? (If yes, why/can you tell me more about this?)
  
  - Can you tell me about any changes to community pharmacy services as a result of the pandemic that you would like to see remain in place?  
(Prompt: Flu vaccination services, COVID-19 vaccination services, text alerts, change in methods of service delivery to maintain social distance e.g. video consultations, telephone calls and medicines pick up)
    - What would you **not** like to see remain in place?

---

<sup>1</sup> The researcher will rephrase the question if necessary and not verbalise these as far as possible to avoid leading the interviewee

- 1  
2  
3  
4  
5  
6  
7  
8  
9  
10  
11  
12  
13  
14  
15  
16  
17  
18  
19  
20  
21  
22  
23  
24  
25  
26  
27  
28  
29  
30  
31  
32  
33  
34  
35  
36  
37  
38  
39  
40  
41  
42  
43  
44  
45  
46  
47  
48  
49  
50  
51  
52  
53  
54  
55  
56  
57  
58  
59  
60
- COVID-19-related information came from several different sources during the course of the pandemic. Can you tell me about the COVID-19 information that your organisation/department provided to community pharmacies? [*may not be relevant to everyone*] (Prompts: Quality, volume, frequency of distribution, evidence base, source)
    - Did your organisation coordinate information with other professional organisations?
    - What was good about the provision of information?
    - What could have been done differently with community pharmacies in respect of the provision of and the coordination of information?
  - How could community pharmacies have been utilised more to disseminate COVID-19 information to the public? (Prompts: infection control, symptoms and usual course of the disease, testing, contact tracing, seeking help)
    - What could have been done differently by community pharmacy to keep the public informed? (Prompt: about the disease and how to access their medicines)
  - How do you think healthcare professions such as community pharmacy should prepare for a future pandemic or health care crisis? (Prompts: Business continuity / staffing – cross sectoral working, Communication strategies, Advance disaster planning, Guidance for pharmacy contractors on how to manage during a pandemic, Training – community pharmacists + staff?, Training in locality – multidisciplinary? Modernising prescription medicines processes and structures)
  - How can we maintain the supply of medicines to make things run more efficiently if a pandemic were to happen again? [*may not be relevant to everyone*]
    - What needs to change? (Prompts: Prescription review, alignment of quantities on repeat prescriptions, electronic transfer of prescriptions, Dispensing Robots, medicines adherence technology?)
  - How much autonomy should there be for healthcare professionals such as community pharmacists to exercise their own professional judgement in the decisions or actions that they take during an emergency situation such as a pandemic? (Prompts: controlled drugs storage, emergency medicines legislation)
  - What do you think has been the biggest learning point for you in respect of community pharmacy from the pandemic so far?

### Closing the interview

*“That brings us to the end of the interview.*

*Is there anything else about community pharmacy and the ongoing COVID-19 pandemic that you feel has not been covered or that you would like to discuss before we finish up?*

*Do you have any additional comments you would like to make as to the content of the interview or how it went?*

*Thank you very much for making the time to speak with me today.”*

**[Turn the digital recorder off]**



## Appendix 1: Interview participant consent form

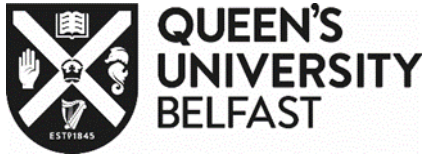

School of Pharmacy

Medical Biology Centre  
97 Lisburn Rd  
Belfast BT9 7BL  
Tel: 028 90972007  
Fax: 028 90247794

**INTERVIEW PARTICIPANT CONSENT FORM**STUDY ID 

**Study Title: The community pharmacy workforce's preparedness for, and response to, the COVID-19 pandemic**

Please initial box

1. I confirm that I have read, or had read to me, and understand the information sheet dated 10/02/2021 (version 1.0) for the above study. I have had the opportunity to ask questions, and these have been answered fully.

2. I understand that my participation is completely voluntary and that I am free to withdraw at any time, without giving any reason and without my legal rights being affected.

3. I understand, and agree to, the interview being digitally audio recorded.

4. I understand that direct quotations from the interview may be used in reports and papers, but that confidentiality and anonymity will be maintained, and it will not be possible to identify me from any publications.

|                                  |             |                                                                  |
|----------------------------------|-------------|------------------------------------------------------------------|
| Other Key Stakeholders Interview | Topic Guide | Study ID <input style="width: 80px; height: 20px;" type="text"/> |
|----------------------------------|-------------|------------------------------------------------------------------|

5. I understand that the researcher may share the pseudonymised audio-recordings with a transcription company for typing and that the company will destroy the recording as soon as the transcription has been checked.

6. I understand that what is discussed during the interview is confidential.

7. I understand that the study is being conducted by researchers from Queen’s University Belfast and that my personal information (including consent forms) will be held securely on University premises (in the School of Pharmacy) and handled in accordance with the provisions of the General Data Protection Regulation (2018).

8. I agree to take part in the above study.

|                                              |             |                  |
|----------------------------------------------|-------------|------------------|
| <b>Name of Participant</b><br>(Please print) | <b>Date</b> | <b>Signature</b> |
| SUSAN PATTERSON                              |             |                  |

|                                             |             |                  |
|---------------------------------------------|-------------|------------------|
| <b>Name of Researcher</b><br>(Please print) | <b>Date</b> | <b>Signature</b> |
|---------------------------------------------|-------------|------------------|

***When completed: A signed copy of this form can be returned by e-mail to [susan.patterson@qub.ac.uk](mailto:susan.patterson@qub.ac.uk) or by post to Dr Susan Patterson, at the address above. Please retain a copy for your personal records.***

***Thank you for your participation in this research.***

## COREQ (COnsolidated criteria for REporting Qualitative research) Checklist

A checklist of items that should be included in reports of qualitative research. You must report the page number in your manuscript where you consider each of the items listed in this checklist. If you have not included this information, either revise your manuscript accordingly before submitting or note N/A.

| Topic                                          | Item No. | Guide Questions/Description                                                                                                                              | Reported on Page No. |
|------------------------------------------------|----------|----------------------------------------------------------------------------------------------------------------------------------------------------------|----------------------|
| <b>Domain 1: Research team and reflexivity</b> |          |                                                                                                                                                          |                      |
| <i>Personal characteristics</i>                |          |                                                                                                                                                          |                      |
| Interviewer/facilitator                        | 1        | Which author/s conducted the interview or focus group?                                                                                                   |                      |
| Credentials                                    | 2        | What were the researcher's credentials? E.g. PhD, MD                                                                                                     |                      |
| Occupation                                     | 3        | What was their occupation at the time of the study?                                                                                                      |                      |
| Gender                                         | 4        | Was the researcher male or female?                                                                                                                       |                      |
| Experience and training                        | 5        | What experience or training did the researcher have?                                                                                                     |                      |
| <i>Relationship with participants</i>          |          |                                                                                                                                                          |                      |
| Relationship established                       | 6        | Was a relationship established prior to study commencement?                                                                                              |                      |
| Participant knowledge of the interviewer       | 7        | What did the participants know about the researcher? e.g. personal goals, reasons for doing the research                                                 |                      |
| Interviewer characteristics                    | 8        | What characteristics were reported about the interviewer/facilitator? e.g. Bias, assumptions, reasons and interests in the research topic                |                      |
| <b>Domain 2: Study design</b>                  |          |                                                                                                                                                          |                      |
| <i>Theoretical framework</i>                   |          |                                                                                                                                                          |                      |
| Methodological orientation and Theory          | 9        | What methodological orientation was stated to underpin the study? e.g. grounded theory, discourse analysis, ethnography, phenomenology, content analysis |                      |
| <i>Participant selection</i>                   |          |                                                                                                                                                          |                      |
| Sampling                                       | 10       | How were participants selected? e.g. purposive, convenience, consecutive, snowball                                                                       |                      |
| Method of approach                             | 11       | How were participants approached? e.g. face-to-face, telephone, mail, email                                                                              |                      |
| Sample size                                    | 12       | How many participants were in the study?                                                                                                                 |                      |
| Non-participation                              | 13       | How many people refused to participate or dropped out? Reasons?                                                                                          |                      |
| <i>Setting</i>                                 |          |                                                                                                                                                          |                      |
| Setting of data collection                     | 14       | Where was the data collected? e.g. home, clinic, workplace                                                                                               |                      |
| Presence of non-participants                   | 15       | Was anyone else present besides the participants and researchers?                                                                                        |                      |
| Description of sample                          | 16       | What are the important characteristics of the sample? e.g. demographic data, date                                                                        |                      |
| <i>Data collection</i>                         |          |                                                                                                                                                          |                      |
| Interview guide                                | 17       | Were questions, prompts, guides provided by the authors? Was it pilot tested?                                                                            |                      |
| Repeat interviews                              | 18       | Were repeat interviews carried out? If yes, how many?                                                                                                    |                      |
| Audio/visual recording                         | 19       | Did the research use audio or visual recording to collect the data?                                                                                      |                      |
| Field notes                                    | 20       | Were field notes made during and/or after the interview or focus group?                                                                                  |                      |
| Duration                                       | 21       | What was the duration of the interviews or focus group?                                                                                                  |                      |
| Data saturation                                | 22       | Was data saturation discussed?                                                                                                                           |                      |
| Transcripts returned                           | 23       | Were transcripts returned to participants for comment and/or                                                                                             |                      |

| Topic                                  | Item No. | Guide Questions/Description                                                                                                        | Reported on Page No. |
|----------------------------------------|----------|------------------------------------------------------------------------------------------------------------------------------------|----------------------|
|                                        |          | correction?                                                                                                                        |                      |
| <b>Domain 3: analysis and findings</b> |          |                                                                                                                                    |                      |
| <i>Data analysis</i>                   |          |                                                                                                                                    |                      |
| Number of data coders                  | 24       | How many data coders coded the data?                                                                                               |                      |
| Description of the coding tree         | 25       | Did authors provide a description of the coding tree?                                                                              |                      |
| Derivation of themes                   | 26       | Were themes identified in advance or derived from the data?                                                                        |                      |
| Software                               | 27       | What software, if applicable, was used to manage the data?                                                                         |                      |
| Participant checking                   | 28       | Did participants provide feedback on the findings?                                                                                 |                      |
| <i>Reporting</i>                       |          |                                                                                                                                    |                      |
| Quotations presented                   | 29       | Were participant quotations presented to illustrate the themes/findings?<br>Was each quotation identified? e.g. participant number |                      |
| Data and findings consistent           | 30       | Was there consistency between the data presented and the findings?                                                                 |                      |
| Clarity of major themes                | 31       | Were major themes clearly presented in the findings?                                                                               |                      |
| Clarity of minor themes                | 32       | Is there a description of diverse cases or discussion of minor themes?                                                             |                      |

Developed from: Tong A, Sainsbury P, Craig J. Consolidated criteria for reporting qualitative research (COREQ): a 32-item checklist for interviews and focus groups. *International Journal for Quality in Health Care*. 2007. Volume 19, Number 6: pp. 349 – 357

**Once you have completed this checklist, please save a copy and upload it as part of your submission. DO NOT include this checklist as part of the main manuscript document. It must be uploaded as a separate file.**

# BMJ Open

**“It stayed there, front and centre”: Perspectives on community pharmacy’s contribution to front-line health care services during the COVID-19 pandemic in Northern Ireland**

|                                 |                                                                                                                                                                                                                                 |
|---------------------------------|---------------------------------------------------------------------------------------------------------------------------------------------------------------------------------------------------------------------------------|
| Journal:                        | <i>BMJ Open</i>                                                                                                                                                                                                                 |
| Manuscript ID                   | bmjopen-2022-064549.R1                                                                                                                                                                                                          |
| Article Type:                   | Original research                                                                                                                                                                                                               |
| Date Submitted by the Author:   | 03-Aug-2022                                                                                                                                                                                                                     |
| Complete List of Authors:       | Patterson, Susan M.; Queen's University Belfast Cadogan, Cathal; Trinity College Dublin, Pharmacy Barry, Heather; Queen's University Belfast, School of Pharmacy Hughes, Carmel; Queen's University Belfast, School of Pharmacy |
| <b>Primary Subject Heading</b>: | Health services research                                                                                                                                                                                                        |
| Secondary Subject Heading:      | Public health, Qualitative research                                                                                                                                                                                             |
| Keywords:                       | COVID-19, Quality in health care < HEALTH SERVICES ADMINISTRATION & MANAGEMENT, PRIMARY CARE, QUALITATIVE RESEARCH                                                                                                              |
|                                 |                                                                                                                                                                                                                                 |

SCHOLARONE™  
Manuscripts



I, the Submitting Author has the right to grant and does grant on behalf of all authors of the Work (as defined in the below author licence), an exclusive licence and/or a non-exclusive licence for contributions from authors who are: i) UK Crown employees; ii) where BMJ has agreed a CC-BY licence shall apply, and/or iii) in accordance with the terms applicable for US Federal Government officers or employees acting as part of their official duties; on a worldwide, perpetual, irrevocable, royalty-free basis to BMJ Publishing Group Ltd ("BMJ") its licensees and where the relevant Journal is co-owned by BMJ to the co-owners of the Journal, to publish the Work in this journal and any other BMJ products and to exploit all rights, as set out in our [licence](#).

The Submitting Author accepts and understands that any supply made under these terms is made by BMJ to the Submitting Author unless you are acting as an employee on behalf of your employer or a postgraduate student of an affiliated institution which is paying any applicable article publishing charge ("APC") for Open Access articles. Where the Submitting Author wishes to make the Work available on an Open Access basis (and intends to pay the relevant APC), the terms of reuse of such Open Access shall be governed by a Creative Commons licence – details of these licences and which [Creative Commons](#) licence will apply to this Work are set out in our licence referred to above.

Other than as permitted in any relevant BMJ Author's Self Archiving Policies, I confirm this Work has not been accepted for publication elsewhere, is not being considered for publication elsewhere and does not duplicate material already published. I confirm all authors consent to publication of this Work and authorise the granting of this licence.

1  
2  
3 ***“It stayed there, front and centre”*: Perspectives on community pharmacy’s contribution to**  
4 **front-line health care services during the COVID-19 pandemic in Northern Ireland**  
5

6 Susan M. Patterson<sup>1</sup>, Cathal A. Cadogan<sup>2</sup>, Heather E. Barry<sup>1</sup>, Carmel M. Hughes<sup>1\*</sup>  
7

8 <sup>1</sup>School of Pharmacy, Queen’s University Belfast  
9

10 <sup>2</sup>School of Pharmacy and Pharmaceutical Sciences, Trinity College Dublin  
11  
12  
13

14 \*Author for correspondence; Carmel M. Hughes, School of Pharmacy, Queen’s University  
15 Belfast, 97 Lisburn Road, Belfast, BT9 7BL, Northern Ireland. Email: c.hughes@qub.ac.uk  
16  
17  
18  
19  
20  
21  
22  
23  
24  
25  
26  
27  
28  
29  
30  
31  
32  
33  
34  
35  
36  
37  
38  
39  
40  
41  
42  
43  
44  
45  
46  
47  
48  
49  
50  
51  
52  
53  
54  
55  
56  
57  
58  
59  
60

For peer review only

## ABSTRACT

**Objectives:** To explore community pharmacists' and key stakeholders' perspectives and reflections on the community pharmacy workforce's preparedness for, and response to COVID-19, including lessons for future public health crises.

**Design, setting and participants:** Qualitative study using semi-structured interviews (via telephone or online videoconferencing platform), with community pharmacists and a range of key stakeholders (representing other health professions, professional/governing organisations concerned with community pharmacy and patient advocacy groups) from across Northern Ireland. Data were analysed using thematic analysis and constant comparison.

**Results:** Thirty interviews were conducted with community pharmacists (n=15) and key stakeholders (n=15). Four themes were identified: (1) adaptation and adjustment (reflecting how community responded quickly to the need to maintain services and adjusted and adapted services accordingly); (2) the primary point of contact (the continuing accessibility of community pharmacy when other services were not available and role as a communication hub, particularly in relation to information for patients and maintaining contact with other health care professionals); (3) lessons learned (the flexibility of community pharmacy, the lack of infrastructure, especially in relation to information technology, and the need to build on the pandemic experience to develop practice); and (4) planning for the future (better infrastructure which reinforced concerns about poor technology, co-ordination of primary care services and preparing for the next public health crisis). There was a general view that community pharmacy needed to build on what had been learned to advance the role of the profession.

**Conclusions:** The strengths of community pharmacy and its contribution to healthcare services in the COVID-19 pandemic were noted by community pharmacists and acknowledged by key stakeholders. The findings from this study should inform the policy debate on community pharmacy and its contribution to the public health agenda.

### Strengths and limitations of this study

- Recruited a diverse range of participants which provided a holistic and in-depth account
- Rigorous approach to data analysis
- Data saturation was achieved



- Focus on NI may mean that the results reflect the local situation
- Participant demographic characteristics have not been reported due to the limited geographical area from which recruitment took place and the need to preserve anonymity

For peer review only

## INTRODUCTION

The COVID-19 pandemic has had profound effects on the delivery of health care worldwide. In the context of the United Kingdom (UK), hospitals faced unprecedented pressures and waiting lists for non-COVID services are now at an all-time high.<sup>[1]</sup> Primary care access, notably general practice, was greatly reduced, but community pharmacy largely remained open and accessible to patients and the public.<sup>[2]</sup>

A three-phase research project was undertaken in Northern Ireland (NI) to assess community pharmacy's preparedness for and response to the pandemic, using Donabedian's over-arching three-pillar model of quality of care: structure, process and outcome.<sup>[3]</sup> Phase 1 (representing structure) was a documentary analysis of guidance and policy documents released over the initial months of the pandemic,<sup>[4]</sup> Phase 2 (process) was used to gather quantitative data from a geographically stratified and representative sample of community pharmacists across NI,<sup>[5]</sup> while Phase 3 (outcome) was a series of semi-structured interviews with community pharmacists and key stakeholders and is reported in this paper. As outlined in the accompanying survey paper,<sup>[5]</sup> practice changed during this time, with essential services being maintained, other services suspended, and new services being implemented. Pharmacies introduced measures to prevent the spread of infection and to protect their staff, and became more involved in public health activities such as 'flu vaccination. Despite feeling unprepared during the first wave (March-May 2020), this changed over time, with pharmacists reporting feeling more prepared when the second wave of infection struck in September 2020. They maintained contact with general practitioner (GP) colleagues and patients (largely by telephone), maintained and updated their professional knowledge, and were enthusiastic about adopting roles that would contribute to future COVID vaccination and testing.<sup>[5]</sup>

Although this questionnaire provided a valuable snapshot of the community pharmacy experience in the early phases of the pandemic, it did not provide an in-depth understanding of the *lived experience* of community pharmacists. Furthermore, there has been little exploration of other stakeholders' views of community pharmacy's contribution to healthcare during the pandemic. Therefore, using the findings from the telephone survey (REF) and with reference to the wider literature, the aim of this study was to explore community pharmacists' and other stakeholders' perspectives and reflections on the

1  
2  
3 community pharmacy workforce's preparedness for, and response to COVID-19, including  
4 lessons for future public health crises  
5  
6

## 7 **METHOD**

8  
9  
10 Key informant interviews were conducted with community pharmacists and other  
11 stakeholders (including representatives from patient organisations) in NI. The study has been  
12 reported in accordance with the consolidated criteria for reporting qualitative research  
13 (COREQ) checklist<sup>[6]</sup> and received ethical approval from the Queen's University Belfast Faculty  
14 of Medicine, Health and Life Sciences Research Ethics Committee (Ref. No. MHLS 21\_21).  
15  
16  
17  
18  
19

### 20 **Setting and population**

21  
22  
23 We sought to recruit key stakeholders for interview including registered community  
24 pharmacists from community pharmacies in NI, representatives of professional and  
25 governing bodies concerned with community pharmacy services in NI (e.g. Department of  
26 Health, Public Health Agency, National Pharmacy Association, and the Pharmaceutical  
27 Society of NI), representatives of other professions such as the Royal College of General  
28 Practitioners, British Medical Association, and representatives of patient advocacy groups,  
29 such as the Patient and Client Council NI, Carers Trust (unpaid carers), Care.org (residential  
30 and nursing homes), and Alzheimer's Society NI.  
31  
32  
33  
34  
35  
36  
37

### 38 **Patient and Public Involvement**

39  
40  
41 Two patient and public involvement (PPI) representatives were recruited to the Study  
42 Advisory Group via the Patient Involvement Enhancing Research (PIER) NI network from the  
43 Health and Social Care Research and Development division. The Study Advisory Group also  
44 included members of the pharmacy profession representing practice, regulation and  
45 professional advocacy, along with a methodological advisor. The Group contributed to the  
46 development of the topic guide (see below), identification of pharmacists to help pilot the  
47 topic guide, with one PPI member participating in a pilot interview one to gauge the clarity  
48 of questions for key stakeholders and duration of the interview. Members of the Group did  
49 not contribute to analysis, but initial findings were presented to them and their comments  
50 were sought.  
51  
52  
53  
54  
55  
56  
57  
58  
59  
60

## Participant sampling and recruitment

### Sampling and recruitment of community pharmacists

We sought to recruit between 15-20 community pharmacists (with the final sample size guided by data saturation). Community pharmacists who took part in the telephone questionnaire study referred to in the Introduction,<sup>[5]</sup> were asked if they were interested in participating in a follow-up interview. Those who expressed an interest were contacted by telephone and those who confirmed interest were sent an invitation letter, information sheet and a consent form. Potential participants were given one week to read and consider this information. After one week had elapsed, if there were more than 20 pharmacists willing to participate, the list of pharmacists was to be randomised as a way to manage high numbers of pharmacists expressing interest in participation. However, following recruitment, there was no necessity to do this. The researcher (SP) contacted them by telephone to arrange a suitable date and time for the interview. These pharmacists were known to the researcher by virtue of having taken part in the preceding study.<sup>[5]</sup>

### Sampling and recruitment of other key stakeholders

We sought to recruit between 15-20 other key stakeholders in total (again, with final sample size determined by data saturation). Convenience sampling was used to recruit a range of additional stakeholders as key informants and was informed initially by consulting with members of a Study Advisory Group that was overseeing the conduct of this study. The research team also identified potential participants through their own professional networks and experience from previous studies, contacting organisations listed above. Potential participants were contacted by email in the first instance to gauge interest. Those who expressed interest were sent an invitation letter, information sheet and a consent form. Potential participants were given one week to read and consider this information, and a mutually suitable date and time were arranged for the interview. The researcher would have been known to some of these key stakeholders, but not all.

## Interview topic guide

The interview topic guides (see Supplementary Files 1 and 2) were developed based on the published literature,<sup>[7][8][9][10]</sup> current COVID-19 guidelines at the time,<sup>[11]</sup> data from a review

1  
2  
3 of the practice and policy literature,<sup>[4]</sup> findings from the telephone questionnaire<sup>[5]</sup> and  
4 discussions within the research team. Five pilot interviews were conducted by SP with  
5 members of the Study Advisory Group and qualified pharmacists from the School of  
6 Pharmacy, Queen's University Belfast to ensure that interview questions were clearly  
7 understood by participants and to estimate the duration of the interview.  
8  
9  
10  
11  
12

### 13 **Data collection and analysis**

14  
15 To adhere with public health guidelines at the time of the study, all interviews were  
16 conducted by telephone or using an online videoconferencing platform. All interviews were  
17 digitally recorded and no visual images of the participants were captured, and no other  
18 persons were present during the interview. Interviews began with a short briefing during  
19 which the researcher (pharmacist with a PhD who had undertaken qualitative work as part  
20 of her doctorate; had a professional interest in the research topic) introduced herself,  
21 outlined the background to the study and provided an overview of the process that would  
22 be followed during the interview. Verbal consent was obtained and recorded at this stage if  
23 not already received electronically in advance. Following the interview, all participants  
24 (where relevant) were offered a certificate of participation (for Continuing Professional  
25 Development purposes) and an honorarium of £50 in recognition of their time and  
26 inconvenience.  
27  
28  
29  
30  
31  
32  
33  
34  
35  
36  
37

38 The digital recordings were transcribed verbatim, and each transcript was checked against  
39 the original recording for accuracy and anonymised to remove names of people, places and  
40 any other identifying information. Each participant was assigned an alphanumeric code, e.g.  
41 community pharmacist (CP), CP097, key stakeholder (KS), KS03. NVivo® 12 Pro software was  
42 used for management and analysis of the transcribed data. The codes used for community  
43 pharmacists were the respondent numbers from the survey study<sup>[5]</sup> which preceded the  
44 interviews. We retained this numeric coding for ease of reference across the two datasets.  
45  
46  
47  
48  
49  
50

51 Reflexive thematic analysis was undertaken concurrently with data collection to determine  
52 data saturation.<sup>[12][13][14]</sup> This was aligned to 'codebook thematic analysis' as described by  
53 Braun and Clarke.<sup>[14]</sup> Each transcript was analysed independently by two researchers (SP  
54 and CMH) using an inductive and iterative approach. After analysis of the first five  
55 transcripts, the research team met to discuss emerging themes and sub-themes, and a  
56  
57  
58  
59  
60

1  
2  
3 coding framework (codebook) was developed based on these. This coding frame was then  
4 used for the analysis of all subsequent transcripts and for re-analysis of the first five  
5 transcripts. An iterative approach ensured that any new themes arising from the data were  
6 identified and added to the coding frame.<sup>[14][15]</sup> Any discrepancies between researchers  
7 were resolved by discussion amongst the research team to reach consensus. Final themes  
8 were reviewed and agreed between all authors to enhance reliability. No transcripts were  
9 returned to participants.  
10  
11  
12  
13  
14  
15

## 16 RESULTS

17  
18  
19 A total of 30 interviews were conducted with community pharmacists (n=15) and key  
20 stakeholders (n=15) from July-September 2021. Due to the relatively small population from  
21 which participants were recruited, we have been very selective about the demographic  
22 information reported to ensure anonymity. In the case of pharmacists, 10 were male, the  
23 age range for the sample was 25-65 years old, five were pharmacy owners (with the  
24 remainder being employees), and eight participants worked in independent pharmacies. In  
25 the case of key stakeholders, nine were female and six were male, with most aged between  
26 45-54 years old. Interviews took place either by telephone (n=22) or via online  
27 videoconferencing (n=8), and lasted between 29-79 minutes (mean=53 minutes). Following  
28 analysis, four themes emerged from the data: (1) adaptation and adjustment; (2) the  
29 primary point of contact; (3) lessons learned; and (4) planning for the future. An overview of  
30 each theme, supported by anonymised quotes, is provided below.  
31  
32  
33  
34  
35  
36  
37  
38  
39  
40  
41

### 42 Theme 1: Adaptation and adjustment

43 The initial phase of the pandemic (from March 2020) was characterised by adaptation and  
44 adjustment on the part of community pharmacists and their staff, who demonstrated high  
45 levels of resilience and flexibility. Initially, there was a sense of panic as realisation dawned  
46 about the risk of infection to pharmacy staff, with little knowledge about the severity of the  
47 disease:  
48  
49  
50  
51  
52

53 *“This was just a perfect storm of a highly infectious disease that was*  
54 *proven to be very, very dangerous, and the information around it was*  
55 *still evolving.”* KS03  
56  
57  
58  
59  
60

1  
2  
3 The effect of the pandemic was unprecedented, pharmacy staff felt unprepared, and were  
4 dealing with a marked increase in workload:  
5  
6

7 *"...but as for being prepared, I don't think anything would have prepared*  
8 *us for the onslaught that we had for the first few weeks"* CP097  
9

10  
11 *"The biggest challenge, initially, was the severely increased workload when there*  
12 *was such an absolute surge in prescription numbers."* CP071  
13  
14

15  
16 As the pandemic continued, community pharmacists demonstrated their ability to adapt,  
17 and showed a high degree of flexibility and resilience in order to maintain essential services  
18 and medicines supplies. Some key stakeholders commented that these activities relieved  
19 the pressure somewhat on other services, including hospital emergency departments and  
20 GPs. Medicines supply was the core service that took priority during the pandemic:  
21  
22  
23  
24

25  
26 *"As entrepreneurs, as innovators, they were able to cope very well with a*  
27 *completely unprecedented situation. They're always prepared for the unknown.*  
28 *They're always agile, but they wouldn't have necessarily been prepared for this."*  
29  
30

31 KS08  
32

33  
34 *"We've had to prioritise, and priority is getting people their medicine."* CP074  
35

36 A key stakeholder representing service users recognised pharmacists' ethos of continuing to  
37 provide care:  
38  
39

40  
41 *"For me, pharmacy was one of the shining lights, it stood its ground. It didn't stand*  
42 *back and didn't revolt and say, 'we have to close, we can't do this, we have to*  
43 *redeploy'. It stayed there, front and centre"* KS10  
44  
45

46  
47 Throughout this period of adaptation and adjustment, participants described the situation  
48 as being emotionally charged with stress, pressure and concern for staff. Community  
49 pharmacists depended on having a strong and flexible staff team to manage the high  
50 workload and patient demands and expectations. Their emotional reactions were evident:  
51  
52  
53

54  
55 *"It would probably be the most challenging professional time of my whole career.*  
56 *Very stressful, very worrying"* CP043  
57  
58  
59  
60

1  
2  
3 There was considerable pressure on pharmacy staff to stay at work; many were worried and  
4 anxious about contracting infection and placing vulnerable family members at risk.  
5  
6 However, they demonstrated commitment to their work and indeed, many increased their  
7 working hours to manage the increased workload and demand from the public. The  
8  
9 pharmacy staff team was considered very important to community pharmacists which was  
10  
11 also recognised by key stakeholders:  
12  
13

14  
15 *“The number of contractors, employers who have spoken to me and said, you know,*  
16 *they just are in awe of their staff who have..., just came in when ones (sic) could have*  
17 *isolated, could have gone on furlough, whatever.”* KS08  
18  
19

20  
21 Throughout the pandemic, community pharmacists maintained essential services and  
22 adapted their services models to provide modified services enabling the continuation of the  
23 critical supply of essential medicines to the public. Pharmacies also implemented  
24 innovations such as the development and provision of modified patient services, e.g.  
25 medicines adherence, prescription collection and delivery services, and a range of new  
26 pandemic services such as flu vaccination, public health advice and an emergency supply  
27 service (whereby a 30-day supply of prescription medicines could be provided to patients  
28 without a prescription) that alleviated the pressure on GP out-of-hours and emergency  
29 department services. There were many positive comments about what worked well:  
30  
31  
32  
33  
34  
35  
36

37  
38 *“The prescriptions, having to be sent to the pharmacy directly from the doctors, I*  
39 *think that was a really good change, it allows you to manage workload.”* CP046  
40  
41

42  
43 *“The other thing is people running out of medication, we’re not supposed to loan*  
44 *anybody anything without going through the emergency supply route. So that was*  
45 *good in that they set up the emergency supply service which pharmacists could give*  
46 *an emergency supply during the pandemic and that worked well and for a change*  
47 *there wasn’t a pile of paperwork to go with it.”* CP097  
48  
49  
50  
51

## 52 **Theme 2: The first point of contact**

53  
54 In the early stages of the pandemic, it was recognised that community pharmacies were one  
55 of the only entry points to primary healthcare services where the public had direct access to  
56 a healthcare professional:  
57  
58  
59  
60



1  
2  
3 *"Our roles have changed dramatically I think of what's expected of us in*  
4 *the community, definitely. Because we're the most accessible healthcare*  
5 *professional."* CP043  
6  
7

8  
9 *"They [patients] would have been very quick to say of the reliance that*  
10 *they had on the community pharmacist. And it was always followed up by*  
11 *the comment, "Because we can't get to a doctor, we can't get access to a*  
12 *doctor," you know."* KS12  
13  
14  
15

16  
17 Community pharmacists reported that patients increasingly relied on them as  
18 the first point of contact for advice, either in person or by telephone:  
19

20  
21 *"So, I think that has really changed for us in that we are now their first point of*  
22 *contact really. And even now we are seeing that people are coming to see us even*  
23 *before they phone the doctor and saying, 'Well, what do you think, should I phone*  
24 *the doctor? How should I manage this? What's your opinion?'"* CP046  
25  
26  
27  
28

29  
30 Community pharmacies also played a key role in information provision, representing the  
31 hub for communication of COVID-19 information directly to patients, other healthcare  
32 professionals and each other. The Public Health Agency in NI rolled out a series of  
33 campaigns on COVID-19 and community pharmacies were central to that communication to  
34 patients. Being in the front line of healthcare resulted in community pharmacists having to  
35 adopt an expanded role, undertaking new services (notably COVID vaccination) and utilising  
36 skills in triage and assessment of patients:  
37  
38  
39  
40  
41

42  
43 *"Now it's a lot more about trying to help people with diagnoses and treatments and*  
44 *signposting them on then to where they really need to be."* CP046  
45  
46

47  
48 *"So, to have done that number [COVID vaccinations] in such a short period of time*  
49 *has been fantastic"* KS01  
50

51  
52 However, being this first point of contact was sometimes overwhelming, especially with  
53 respect to the amount of information being provided by organisations for onward  
54 distribution and dissemination, which was duplicative and sometimes out of date by the  
55 time that it arrived:  
56  
57  
58  
59  
60

1  
2  
3  
4  
5  
6  
7  
8  
9  
10  
11  
12  
13  
14  
15  
16  
17  
18  
19  
20  
21  
22  
23  
24  
25  
26  
27  
28  
29  
30  
31  
32  
33  
34  
35  
36  
37  
38  
39  
40  
41  
42  
43  
44  
45  
46  
47  
48  
49  
50  
51  
52  
53  
54  
55  
56  
57  
58  
59  
60

*“The problem is, you were standing there, and it might have been Wednesday the 10<sup>th</sup> and that letter [e.g. advice from Department of Health or Health Board] is dated Tuesday the 2<sup>nd</sup>”. CP072*

*“And we would just go in and there would be multiple emails printed off from work, read this, this, this and this at the start of the day. So, I suppose maybe if it could be centralised and come from one source, or fewer sources, it would have made it maybe easier to handle.” CP046*

Community pharmacists maintained communication with other members of the primary health care team, particularly GPs and practice pharmacists, and thought that relationships in primary care had improved, despite practices remaining largely closed in the early stages of the pandemic:

*“We found working with the practice pharmacists very good during the pandemic. They were a really good resource to have. Because if you maybe couldn't get hold of the GP themselves, the practice pharmacists were really well based to speak to you’ CP046*

### Theme 3: Lessons learned

The importance of community pharmacy in health care was a key lesson. An unintended consequence of the pandemic was the spotlight placed on community pharmacy, demonstrating what it could do. The response from community pharmacy during the pandemic was universally praised, and its reputation was enhanced:

*“It’s just reinforced how big a part community pharmacists and the community pharmacy team, members of staff, etc. play and how important they are and just to remember that we are really, really important to the people who we treat.” CP043*

*“I think it is well recognised by a range of stakeholders of just how important the community pharmacy contribution during COVID has been, ranging from the Health Minister, and elected, various elected political representatives, through to the Health Service officials, and indeed the public at large.” KS07*

1  
2  
3 The maintenance of medicines supply was seen as critical (and perhaps somewhat under-  
4 appreciated up to this point as it seemed 'basic'), with recognition that the system could  
5 have collapsed without this:  
6  
7

8  
9 *"The main contribution of community pharmacy, as I said, was maintaining access to*  
10 *medicines, and they did that, and they maintained public access to medicines' KS03*

11  
12  
13 *"The continuity of supply of medicines. The fact that we were able to keep things*  
14 *going. Generally speaking, bar maybe some isolated incidents, I'm not aware of any,*  
15 *but nobody ended up in hospital because they didn't have their medication."* CP071  
16  
17  
18

19  
20 Through the adaptation and adjustment made to services (and highlighted in Theme 1),  
21 services were introduced quickly as a result of the profession's agility and flexibility, and  
22 pharmacists provided important new and modified services that they would want to retain  
23 in the future, another key lesson. The retention of these services was supported by key  
24 stakeholders:  
25  
26  
27  
28

29  
30 *"Community pharmacy I think would have a role to play in that, so there's [sic] not*  
31 *about dispensing more tablets, it's more about looking at the individual's needs and*  
32 *how the individual can be supported either individually or in a community context."*  
33  
34  
35  
36  
37  
38  
39  
40  
41  
42  
43  
44  
45  
46  
47  
48  
49  
50  
51  
52  
53  
54  
55  
56  
57  
58  
59  
60

61  
62 The agility and flexibility (reinforcing Theme 1) of pharmacy staff and their commitment to  
63 the care of patients was evident as they stepped up and took more responsibility for  
64 frontline patient care, putting previously learned skills into practice. It was noted how much  
65 was implemented in a short space of time:  
66  
67  
68  
69  
70

71  
72 *"I think the biggest thing is how adaptable we are and how quickly we can change*  
73 *things around because there was an absolutely mad two or three weeks back in*  
74 *March/April 2020, where the pharmacies really, really had to dig deep, including the*  
75 *staff and all the rest of it to get the job done basically without the system falling*  
76 *down. Because that would have been catastrophic, you know."* CP071  
77  
78  
79  
80

81  
82 *"The pharmacy profession has really benefited from that in that they [patients] could*  
83 *see what we can actually do. So that would be the biggest change I would have*  
84 *noticed which is good for the profession."* CP52  
85  
86

1  
2  
3 However, it was recognised that the lack of infrastructure, especially with respect to  
4 information technology (IT), had been problematic during the pandemic, and led to  
5 significant frustration. Participants described the IT system as “antiquated”, and a key lesson  
6 learned from the pandemic was the need for electronic transfer of prescriptions (eTP):  
7  
8  
9

10  
11 *“And just the fact that we’re still chasing paper, you know, at this stage is crazy to be*  
12 *honest. My number one thing would be definitely have electronic prescriptions.”*

13  
14 CP083

15  
16  
17 *“I think what it has shown is that the absolute number one priority is the electronic*  
18 *prescribing, because that gives a sustainable future to what we’ve started to do.”*

19  
20  
21 KS05  
22

23 Other lessons learned included the value of the newly introduced emergency supply service,  
24 the enhanced contribution to health care that community pharmacy could make, and the  
25 need for more formal and recognised integration of community pharmacy into the primary  
26 health care team. Concern was expressed that post-pandemic, community pharmacy’s  
27 contribution would be forgotten, so the opportunity needed to be seized in order to  
28 capitalise on the good will that had been engendered:  
29  
30  
31  
32  
33

34  
35 *“And it would be nice that, you know, we’ve had all the plaudits and the pats on the*  
36 *back with politicians coming out and getting photo opportunities in community*  
37 *pharmacies and such like. It would be nice to get properly paid and to have a*  
38 *contract in place, and us given that respect that is due after all this. I think that is the*  
39 *biggest thing that I would like to see come out of this.”* CP018  
40  
41  
42  
43

44  
45 *“But as the health service normalises, then there is always the risk that pharmacy*  
46 *reverts back to a hidden role.”* KS07  
47  
48

#### 49 **Theme 4: Planning for the future**

50  
51 This final theme linked closely to that presented in Theme 3 in that participants felt that the  
52 lessons learned needed to feed into planning for the post-pandemic future. Areas where  
53 planning was seen as critical were infrastructure, review and co-ordination of service  
54 provision (including the workforce) and preparing for the next emergency.  
55  
56  
57

58  
59 Improvement and upgrading of the current infrastructure were viewed as an urgent priority:  
60

1  
2  
3 *“And I think it’s archaic that we’re using paper prescriptions”* CP074  
4

5  
6 *“So, it’s dealing with those patients who become frustrated with the process basically*  
7 *for repeat prescriptions. To me, it isn’t a very effective use of doctor or even practice-*  
8 *based pharmacist’s time... Yeah, electronic prescription transmission would certainly*  
9 *help with that sort of thing.”* CP071  
10  
11  
12

13  
14 This view also extended to access to patient records by community pharmacists, to facilitate  
15 the development of the clinical role:  
16

17  
18 *“This is about reducing administrative burden, reducing regulatory burden, so that*  
19 *the focus can be on patient services, and patient support, patient advice, patient*  
20 *information, and the safe supply of medicines to patients, and building the services*  
21 *around those contacts that you make whenever medicines are supplied.”* KS07  
22  
23  
24  
25

26 There was overwhelming support for extending the role of community pharmacists and  
27 reviewing the range of patient-facing or clinical services they provide:  
28

29  
30 *“I think the government should maybe pay attention to that [providing clinical*  
31 *services] and the health service would benefit from it dramatically. That’s the way I*  
32 *would love to see pharmacy going.”* CP111  
33  
34  
35

36 Such services included public health initiatives, vaccinations, the maintenance of the new  
37 emergency supply system introduced during the pandemic, and independent prescribing:  
38  
39

40  
41 *“I actually think... the emergency supplies. I think that they potentially, you know,*  
42 *even post pandemic I think there’s a place for them. I think they [community*  
43 *pharmacists] should be allowed some trust when it comes to, you know, providing*  
44 *medication where it’s impossible to get a prescription. Because obviously we have*  
45 *the knowledge, and we have the information from their PMR [patient medication*  
46 *records] system to make that call.”* CP074  
47  
48  
49  
50

51  
52 *“I would like to think in a future pandemic we would have more independent*  
53 *prescribers in community pharmacy as well, and who could be managing larger*  
54 *formularies of medicines. So, that would help the public access and treatment for*  
55 *specific conditions”* KS03  
56  
57  
58  
59  
60

1  
2  
3 Better coordination between sectors within the profession and interprofessional linkages  
4 were seen as important for the future success of community pharmacy, along with  
5 supporting and enhancing the workforce:  
6  
7

8  
9 *“So, that lack of co-ordination, I think, on the ground between primary care. It was*  
10 *always there, but that hasn’t improved with the pandemic, whereas relations with*  
11 *the Board (organisation responsible for commissioning services in NI) have*  
12 *improved.”* KS08  
13  
14

15  
16  
17 *“So, the only thing I’d like is somebody to pull a couple of hundred or a few hundred*  
18 *pharmacists available to community pharmacy out of the hat! So, the one thing I*  
19 *definitely don’t want to see continuing is the lack of pharmacy cover and staff”*  
20  
21

22  
23 CP071  
24

25 Although community pharmacy had demonstrated its agility in dealing with the pandemic,  
26 there was an acknowledgement that future planning for another emergency (pandemic)  
27 had to be much more co-ordinated:  
28  
29

30  
31 *“But I think just having systems in place and, you know, having a plan. A pandemic*  
32 *plan needs to be drawn up and then we need to be trained on it. So, if this happens,*  
33 *we do this, if this happens, we do that. And, you know, a stockpile of PPE [personal*  
34 *protective equipment] and stuff like that that could be drawn upon. Because PPE*  
35 *and sanitiser was a big issue at the start as well”* CP132  
36  
37  
38

39  
40  
41 *So, there’s a learn there in terms of services, and the sort of dynamic commissioning,*  
42 *and decommissioning, if you like, and for community pharmacies just being prepared*  
43 *for that as well.”* KS03  
44  
45

46  
47 *“Planning, in terms of workforce, needs to be better, because we’re just in a difficult*  
48 *place at the minute in terms of adequacy of workforce. So, that needs to be sort of*  
49 *regularised or resolved ahead if there’s another cyclical pandemic.”* KS07  
50  
51

52  
53 There was a clear view that community pharmacy’s contribution during the pandemic had  
54 demonstrated its value and provided momentum for the profession’s trajectory:  
55  
56  
57  
58  
59  
60

1  
2  
3  
4  
5  
6  
7  
8  
9  
10  
11  
12  
13  
14  
15  
16  
17  
18  
19  
20  
21  
22  
23  
24  
25  
26  
27  
28  
29  
30  
31  
32  
33  
34  
35  
36  
37  
38  
39  
40  
41  
42  
43  
44  
45  
46  
47  
48  
49  
50  
51  
52  
53  
54  
55  
56  
57  
58  
59  
60

*“Pharmacy has indicated very clearly how it can make a contribution in the acute pandemic phase which has just kind of proved what pharmacies have been saying all along, and that just needs to be now captured and I think given expression.” CP047*

*“We have a direction of travel here, and we build on what has been achieved.” KS07*

## DISCUSSION

This study has captured the views and perspectives of community pharmacists who worked during the early phases of the pandemic, and those of key stakeholders (some of whom were pharmacists) representing a wide range of constituencies and interests. We had framed the three-phase study using Donabedian’s framework,<sup>[3]</sup> and this third phase represented the ‘outcome’ aspect of the framework in terms of reflections and experiences of community pharmacists and a broad range of key stakeholders. The findings clearly convey a recognition of community pharmacy’s contribution to maintaining essential health services during the early phases of the pandemic, particularly when other services were not accessible or available. Key stakeholders were very appreciative of what community pharmacy had done, and perhaps one of the unintended consequences of the pandemic was to highlight the role that community pharmacy could play in a post-pandemic health service.

At the beginning of the pandemic, community pharmacy had to adapt and adjust. Community pharmacist participants recounted the increased workload, uncertainty, a feeling of unpreparedness, fear, and worry. But as was recognised, they demonstrated agility, resourcefulness, innovation, unceasing commitment and maintained key services and introduced new and adapted ones. These characteristics were also reflected by Liu et al.<sup>[16]</sup> who reported on the experiences of pharmacists in China at the start of the pandemic. They highlighted the importance of rapid adaptability and resiliency of individual practitioners to rapidly changing circumstances of the pandemic.<sup>[16]</sup> Interviews with primary care professionals (largely GPs and nurses) from eight European countries also revealed a rapid transformation of services with the onset of COVID-19, in the context of uncertainty about diagnosis, management and treatment.<sup>[17]</sup>

1  
2  
3 Much of what community pharmacists did during the early stages of the pandemic reflected  
4 a Pharmacy Emergency Preparedness and Response Framework developed by Aruru et al.<sup>[18]</sup>  
5 consisting of five components - emergency preparedness and response, operations  
6 management, patient care and population health interventions, public health, and  
7 continuing professional education. An important part of this Framework specifically refers to  
8 the importance of preparation and flexibility in emergency circumstances to ensure  
9 effective responses and worker safety.<sup>[18]</sup> Community pharmacy activities as reported in this  
10 study exemplified these components. A scoping review by Costa et al.<sup>[19]</sup> outlined current  
11 practices on COVID-19 reported by pharmacy professional associations from across 32  
12 countries. Almost all preventive measures to reduce health risks had been provided in most  
13 countries. Other frequent interventions reflected preparedness for stockpiling, increased  
14 demand for services and products, and important patient care interventions beyond the  
15 dispensing role. In view of COVID-19, changes to regulation and legislation enabled services  
16 to be delivered that improved access to medicines and relevant products, patient screening  
17 and referral including point-of-care antigen testing, support to vulnerable patients, and  
18 COVID-19 vaccination.<sup>[19]</sup> Again, many of these activities were undertaken by pharmacists in  
19 the present study and were recognised by participating stakeholders.

20  
21  
22  
23  
24  
25  
26  
27  
28  
29  
30  
31  
32  
33  
34  
35 Community pharmacy was inundated with patients seeking help due to the lack of  
36 availability of other services which has been reported in other UK-based studies.<sup>[10]</sup>  
37 Pharmacists were the first point of contact, and indeed, sometimes the only point of  
38 contact, demonstrating the critical role that community pharmacy played in delivery of  
39 primary care during the pandemic. These observations are consistent with the comments  
40 from Traynor<sup>[20]</sup> who stated that “pharmacists matter in a pandemic response”, highlighting  
41 how pharmacies and pharmacists could and should serve a more useful role in society-wide  
42 pandemic preparedness. It was recognised that in addition to providing vaccinations,  
43 community pharmacies could become decentralised primary care service hubs, triaging  
44 patients prior to accessing family doctors or emergency rooms, and providing more direct  
45 hands-on support for medication therapy management at the patient and community  
46 level.<sup>[20]</sup> And based on our interview data, this appeared to happen in the early stages of the  
47 pandemic, with community pharmacy becoming that main point of contact. Indeed, these  
48 findings are consistent with a 2020 Report from the Organisation for Economic Co-operation  
49 and Development (OECD) which highlighted the role of community pharmacies in providing  
50 primary care services during the pandemic.<sup>[21]</sup>



1  
2  
3 and Development (OECD) which identified pharmacists as primary care providers in its  
4 definition of primary health care.<sup>[21]</sup> The Report outlined that there is ample scope for  
5 further developing the role of pharmacists and the need to develop more effective  
6 collaboration with the GPs and other healthcare professionals.  
7  
8  
9

10  
11 As a result, pharmacists reported that they perceived that patients now viewed them in a  
12 different light and were asking for advice and intervention from community pharmacists  
13 that may have been previously given by other sources, e.g. general practice. They  
14 disseminated information on COVID and participated in vaccination campaigns. But this also  
15 led to a surge in workload which was difficult to manage at times. In addition, by the time  
16 information was received, it was often out of date, and there was a recognition from some  
17 key stakeholders that there was probably too much information disseminated. This was also  
18 reported by Austin and Gregory<sup>[22]</sup> who interviewed 21 pharmacists based in Ontario,  
19 Canada, with a view to exploring resilience during the pandemic. These pharmacists noted  
20 the early stages of the pandemic as being a time of information overload and confusion.  
21 Most participants in the Canadian study reported increasing reliance on the websites of, and  
22 emails from, regulatory bodies and professional associations as their primary source of  
23 information. However, there was also frustration that communication from these  
24 organisations was often ambiguous and unclear.<sup>[22]</sup> A Belgian study reporting on interviews  
25 with GPs, highlighted an over-supply of information on COVID-19 which was also  
26 contradictory.<sup>[23]</sup> Wanat et al.<sup>[17]</sup> documented that primary care participants often felt  
27 overwhelmed with information that was constantly changing and coming from multiple  
28 sources.  
29  
30  
31  
32  
33  
34  
35  
36  
37  
38  
39  
40  
41  
42  
43  
44

45 The experience of working in the pandemic gave participants the opportunity to consider  
46 lessons learned. These lessons highlighted the importance of community pharmacy and its  
47 essential role in maintaining medicines supply, services that should be retained post-  
48 pandemic, and the adaptability and flexibility of community pharmacists and staff to meet  
49 demands. But there was also recognition as to the limits of what could be done largely due  
50 to outdated infrastructure, notably information technology (IT). Participants expressed  
51 frustration at antiquated systems, largely paper-based, and called for investment in better  
52 systems. Austin and Gregory<sup>[22]</sup> in their interview study noted that pharmacy organisations  
53 that had previously invested in technology were much better able to manage the surge in  
54  
55  
56  
57  
58  
59  
60

1  
2  
3 workload than those without such systems. In this present study, there was strong support  
4 for a change to IT services.  
5  
6

7  
8 Finally, while the contribution of community pharmacy was universally recognised, there  
9 were concerns that the lessons learned and experience gained could be quickly forgotten in  
10 the post-pandemic world. There was a view that the goodwill and recognition of pharmacy  
11 and its contribution needed to be exploited in order to plan for the future, and instigate  
12 much needed change. And indeed, many of the lessons and experience fed into planning for  
13 the future which was the final theme. There was reinforcement of needing better  
14 infrastructure (IT being a case in point), better coordination and review of services  
15 (including workforce) and planning for the next emergency. This call for better planning was  
16 echoed by Wanat et al.<sup>[17]</sup> Community pharmacists were very willing to assume a much  
17 more prominent public health role, and to be a primary point of contact as they had been  
18 during the pandemic. There was also support for a prescribing role and better co-ordination  
19 across other health sectors, the need for more staffing, and much better planning and  
20 training for the next pandemic. Again, this reflects what other community pharmacy studies  
21 have reported, with a particular emphasis on the necessary infrastructure.<sup>[22]</sup>  
22  
23  
24  
25  
26  
27  
28  
29  
30  
31  
32  
33

34  
35 Although the current study did not explicitly seek to inform and develop policy, it has been  
36 highlighted in a report from the King's Fund that 'the road to renewal' in the post-pandemic  
37 health and care system has to focus on a number of key areas including workforce, digital  
38 changes and the relationship between communities and public services.<sup>[24]</sup> These priorities  
39 reflect those for community pharmacy. We had framed the three-phase study using  
40 Donabedian's framework,<sup>[3]</sup> and this third phase represented the 'outcome' aspect of the  
41 framework in terms of reflections and experiences of community pharmacists and a broad  
42 range of other key stakeholders.  
43  
44  
45  
46  
47  
48

49  
50 The strengths and limitations of this study should be acknowledged. We recruited a diverse  
51 range of participants who had had direct experience of delivering or planning services over  
52 the course of the pandemic. The views of key stakeholders provided a more external  
53 perspective to that of community pharmacists, but largely reinforced the views of the latter.  
54 We attained data saturation with the sample recruited, and the findings reinforced those  
55 from a preceding study,<sup>[5]</sup> but through the interviews, more in-depth discussion was  
56  
57  
58  
59  
60

1  
2  
3 possible which provided a more nuanced understanding of the issues. However, all  
4 participants were recruited from the same geographical region, perhaps limiting  
5 transferability of findings. It should be noted that other studies conducted in the community  
6 pharmacy sector which have evaluated the impact of the pandemic have reported  
7 complementary findings and themes.<sup>[10][16][22]</sup> Due to the close-knit nature of health care  
8 delivery and policy organisation in Northern Ireland, we decided not to report any  
9 participant characteristics e.g. gender, professional role, in order to maintain anonymity.

10  
11  
12 The COVID-19 pandemic has had a profound effect on healthcare delivery across the world.  
13 Community pharmacy was very much part of the front-line of services that remained  
14 accessible to patients. The data generated in this study have highlighted how the profession  
15 responded under the most difficult of circumstances, but have also demonstrated on what  
16 can be derived from the experience in order to inform future planning for the profession.  
17 Moynihan et al.<sup>[25]</sup> in their systematic review on the impact of the COVID-19 pandemic on  
18 healthcare service utilisation, suggested that post-pandemic recovery provided a rare  
19 opportunity for systematic changes in healthcare systems. This very much reflects the  
20 community pharmacy scenario in which participants also wanted to use the pandemic  
21 experience to progress the role of community pharmacy in a strategic way, and as conveyed  
22 by the findings in this study, community pharmacists were willing and enthusiastic to deliver  
23 on such strategies.

24  
25  
26  
27  
28  
29  
30  
31  
32  
33  
34  
35  
36  
37  
38  
39  
40  
41  
42 **Acknowledgements:** The authors wish to acknowledge the contribution of all participants to  
43 this study. We also wish to thank the members of the Study Advisory Group for their advice  
44 and support and those who helped to pilot the topic guides.

45  
46  
47  
48  
49 **Contributors:** Conception/design: CAC, HEB, CMH; Acquisition, analysis or interpretation of  
50 the data: SMP, CAC, HEB, CMH; Manuscript drafting, revision, approval: SMP, CAC, HEB,  
51 CMH. Overall guarantors: CMH. The guarantor accepts full responsibility for the work and/or  
52 the conduct of the study, had access to the data and controlled the decision to publish.

53  
54  
55  
56  
57  
58 **Funding:** This work was funded by the Health and Social Care Research and Development  
59 Division of the Public Health Agency, NI, under its COVID-19 Rapid Response Funding Call  
60

(Ref. No. COM/5601/20). The content or views expressed are those of the authors/presenters and do not necessarily reflect the official views of the HSC R&D Division.

**Competing interests:** None to declare

**Patient consent for publication:** Not required

**Data availability statement:** Data are available upon reasonable request

**Ethics statement:** This study received ethical approval from the Queen's University Belfast Faculty of Medicine, Health and Life Sciences Research Ethics Committee (Ref. No. MHLS 21\_21).

## REFERENCES

1. NHS England and NHS Improvement. Delivery plan for tackling the COVID-19 backlog of elective care. February 2022. Available at <https://www.england.nhs.uk/coronavirus/wp-content/uploads/sites/52/2022/02/C1466-delivery-plan-for-tackling-the-covid-19-backlog-of-elective-care.pdf> [Accessed March 7th 2022]
2. Parkhurst C, Purewal GS, Donyai P. Community pharmacy and COVID-19-the unsung heroes on our high streets. *J Patient Exp* 2020;7:282-284
3. Donabedian A. The quality of care. How can it be assessed? *JAMA* 1988;260:1743-8
4. Barry HE, Cadogan CA, O'Reilly E, et al. Changes to community pharmacy practice during the COVID-19 pandemic: a cross-country documentary analysis. *Int J Pharm Pract* 2022;30(S1):i21-i22
5. Patterson SM, Cadogan CA, Barry HE, et al. A cross-sectional questionnaire study of the experiences of community pharmacists in Northern Ireland during the early phases of the COVID-19 pandemic: preparation, experience and response. *BMJ Open*, submitted
6. Tong A, Sainsbury P, Craig J. Consolidated criteria for reporting qualitative research (COREQ): a 32-item checklist for interviews and focus groups. *Int J Qual Health Care* 2007;19:349-57
7. Adam J, Khazaka M, Charikhi F, et al. Management of human resources of a pharmacy department during the COVID-19 pandemic: Take-aways from the first wave. *Res Soc Admin Pharm* 2021;17:1990-1996
8. Koster ES, Philbert D, Bouvy ML. Impact of the COVID-19 epidemic on the provision of pharmaceutical care in community pharmacies. *Res Soc Admin Pharm* 2021;17:2002-2004

- 1  
2  
3 9. Visacri MB, Figueiredo IV, Lima TM. Role of pharmacist during the COVID-19  
4 pandemic: A scoping review. *Res Soc Admin Pharm* 2021;17:1799-1806
- 5  
6 10. Zaidi STR, Hasan SS. Personal protective practices and pharmacy services delivery by  
7 community pharmacists during COVID-19 pandemic: results from a national study.  
8 *Res Soc Admin Pharm* 2021;17:1832-1837
- 9  
10 11. Department of Health. COVID-19 Guidance 2021. Available at: [COVID-19 - Guidance](#)  
11 | [Department of Health \(health-ni.gov.uk\)](#) and [Guidance for HSC staff, healthcare](#)  
12 [workers and care providers | HSC Public Health Agency \(hscni.net\)](#) [Accessed January  
13 2021]
- 14  
15 12. Green J, Thorogood N. Qualitative methods for health research. 3rd ed., London:  
16 Sage Publications. 2014
- 17  
18 13. Braun V, Clarke V. Using thematic analysis in psychology. *Qual Res Psychol*  
19 2006;3:77-101.
- 20  
21 14. Braun V, Clarke V. Reflecting on reflexive thematic analysis. *Qual Res Sport Exerc*  
22 *Health* 2019;11:589-597
- 23  
24 15. Austin Z, Sutton J. Research methods in pharmacy practice. Methods and  
25 applications made easy. 1<sup>st</sup> Ed, China: Elsevier Health Sciences. 2019. ISBN:978-0-70-  
26 207-426-4
- 27  
28 16. Liu S, Luo P, Tang M et al. Providing pharmacy services during the coronavirus  
29 pandemic. *Int J Clin Pharm* 2020;42:299-403
- 30  
31 17. Wanat M, Hoste M, Gobat N, Anastasaki M, Bohmer F, Chlabicz S, et al.  
32 Transformation of primary care during the COVID-19 pandemic. *Br J Gen Pract*  
33 2021;71:e634-e642
- 34  
35 18. Aruru M, Truong HA, Clark S. Pharmacy Emergency Preparedness and Response  
36 (PEPR): a proposed framework for expanding pharmacy professionals' roles and  
37 contributions to emergency preparedness and response during the COVID-19  
38 pandemic and beyond. *Res Soc Admin Pharm* 2021;17:1967-1977
- 39  
40 19. Costa S, Romao M, Mendes M, et al. Pharmacy interventions on COVID-19 in  
41 Europe: Mapping current practices and a scoping review. *Res Soc Admin Pharm*  
42 [doi.org/10.1016/j.sapharm.2021.12.003](https://doi.org/10.1016/j.sapharm.2021.12.003)
- 43  
44 20. Traynor K. Pharmacists matter in pandemic response. *Am J Health-Syst Pharm*  
45 2008;65(19):192-1793
- 46  
47 21. Organisation for Economic Co-operation and Development (OECD). *OECD Health*  
48 *Policy Studies*. Realising the Potential of Primary Health Care; 2020.  
49 <https://doi.org/10.1787/a92adee4-en>.
- 50  
51 22. Austin Z, Gregory P. Resilience in the time of pandemic: the experience of  
52 community pharmacists during COVID-19. *Res Soc Admin Pharm* 2021;17:1867-  
53 1875
- 54  
55 23. Verhoeven V, Tsakitzidis G, Philips H, et al. Impact of the COVID-19 pandemic on the  
56 core functions of primary care: will the cure be worse than the disease? A qualitative  
57 interview study in Flemish GPs. *BMJ Open* 2020;10:e039674. doi:10.1136/bmjopen-  
58 2020-039674
- 59  
60

- 1  
2  
3  
4  
5  
6  
7  
8  
9  
10  
11  
12  
13  
14  
15  
16  
17  
18  
19  
20  
21  
22  
23  
24  
25  
26  
27  
28  
29  
30  
31  
32  
33  
34  
35  
36  
37  
38  
39  
40  
41  
42  
43  
44  
45  
46  
47  
48  
49  
50  
51  
52  
53  
54  
55  
56  
57  
58  
59  
60
24. Charles A, Ewbank L. The road to renewal: five priorities for health and care. The King's Fund, 2021. Available at <https://www.kingsfund.org.uk/publications/covid-19-road-renewal-health-and-care> [Accessed March 15<sup>th</sup> 2022]
25. Moynihan R, Snaders S, Michaleff ZA, et al. Impact of COVID-19 pandemic on utilisation of healthcare services: a systematic review. *BMJ Open* 2021;11:e045343. doi:10.1136/bmjopen-2020-045343

For peer review only

A mixed methods study of the community pharmacy workforce's preparedness for, and response to, the COVID-19 pandemic

## COMMUNITY PHARMACIST INTERVIEW TOPIC GUIDE

### Introduction

*"Hello, my name is Susan Patterson and I am a researcher from the School of Pharmacy, Queen's University Belfast. Thank you very much for making the time to speak with me today.*

*Have you had a chance to read through the information sheet that was sent out to you? Would you like me to read you a short summary? Are there any questions that you would like to ask me before we start?"*

Optional section to read if the pharmacist hasn't read the participant information sheet

*"In this research project, we are interested in finding out about the community pharmacy workforce's preparedness for, and response to, the COVID-19 pandemic. In the first part of this project, we reviewed various documents relating to structural changes to community pharmacy practice (i.e. infrastructure, funding/resourcing, legislation, policies and guidelines) in Northern Ireland in preparation for and/or in response to the COVID-19 pandemic. In the second part we contacted 130 community pharmacists in Northern Ireland by telephone and asked them to complete a short questionnaire about how they prepared for and responded to the COVID-19 pandemic. You participated in this stage and expressed an interest in taking part in the next stage of the study. Now we are speaking to a range of key stakeholders to further explore perspectives and reflections on the community pharmacy workforce's preparedness for, and response to COVID-19, including lessons for future public health crises. We will be exploring the views and experiences of community pharmacists in more detail and will also be interviewing representatives of patients, the pharmacy and medical professions, policy makers and service commissioners."*

Explaining what will happen in the interview and afterwards

*"I will be recording the interview on a digital recorder, to ensure that we have an accurate and detailed record of what you say. The recording will be saved on a password-protected computer and only those immediately involved in the research study and a transcriber (who will sign a confidentiality agreement) will be able to listen to it. The recording will be typed up word-for-word and any names, locations, or anything else that could identify you will be removed so that the information is anonymous. After we have conducted interviews with all participants, we will analyse the information within the research team. The interview should last approximately 40 minutes. You are free to stop*

1  
2  
3 *the interview and/or recording at any point. If there are any questions that you would prefer not to*  
4 *answer, just let me know and we can move on to the next question.”*

#### 6 7 **Consent**

8 *“Before we start, I need to obtain your consent to ensure that you understand what the study involves;*  
9 *that anything you say will be kept completely confidential, that you will not be identified in any way,*  
10 *and also that you are happy for the interview to be recorded.”*

11  
12  
13  
14  
15  
16 **If the interview is conducted in person:** *“Can you please read through the consent form (Appendix*  
17 *1) and initial each box to indicate that you understand and agree with each statement, before signing*  
18 *and dating the form? There are two copies: you will keep one of them and I will keep the other for our*  
19 *records.”*

20  
21  
22  
23 **[Turn the digital recorder on]**

24  
25 **[Consent form – see Appendix 1]**

26  
27  
28  
29  
30 **If the interview is conducted by telephone:** *“I will now read you a series of statements about the*  
31 *study (Appendix 1) which I would like you to respond to with either “Yes” or “No”. I will audio-record*  
32 *and note your responses on the consent form.”*



- 1  
2  
3  
4  
5  
6  
7  
8  
9  
10  
11  
12  
13  
14  
15  
16  
17  
18  
19  
20  
21  
22  
23  
24  
25  
26  
27  
28  
29  
30  
31  
32  
33  
34  
35  
36  
37  
38  
39  
40  
41  
42  
43  
44  
45  
46  
47  
48  
49  
50  
51  
52  
53  
54  
55  
56  
57  
58
- How would you sum up your experience of the pandemic while working in community pharmacy?
    - How prepared did you feel?
    - How did your experience change over time?
    - What worked well?
    - What worked less well?
  
  - What do you think were the biggest challenges that the community pharmacy profession has faced during the pandemic?  
(Prompts<sup>1</sup>: protection of pharmacy workforce, concerns about staff illness, staff isolation, risk of pharmacy closure, financial difficulties, essential medicines stock shortages, public panic, GP closure, provision of COVID advice)
  
  - Did the nature of your interactions with the public change during the pandemic?
    - How do you think the public perceived community pharmacists during the pandemic?
    - How do you think public expectations of community pharmacy could be managed in a future pandemic?
  
  - Responses from the telephone questionnaire indicated that during the current pandemic, some pharmacists had some negative experiences with the public. What was your experience?  
(Prompts: aggressive behaviour, panic/anxiety, stockpiling)
    - Were there any common issues or problems that arose?
    - What was the impact on you and your staff?
    - Do you have any thoughts on how this could be avoided in a future pandemic?  
(Prompts: communication with GPs, advance information provided to the public re. changes to the Rx process)
  
  - Do you think the public received sufficient information about COVID-19 from community pharmacy?  
(Prompts: infection control, symptoms and usual course of the disease, testing, contact tracing, seeking help, accessing medicines)

---

<sup>1</sup> The researcher will rephrase the question if necessary and not verbalise these as far as possible to avoid leading the interviewee

- 1  
2  
3  
4  
5  
6  
7  
8  
9  
10  
11  
12  
13  
14  
15  
16  
17  
18  
19  
20  
21  
22  
23  
24  
25  
26  
27  
28  
29  
30  
31  
32  
33  
34  
35  
36  
37  
38  
39  
40  
41  
42  
43  
44  
45  
46  
47  
48  
49  
50  
51  
52  
53  
54  
55  
56  
57  
58  
59  
60
- How do you think the core role of the community pharmacist changed over the course of the pandemic?
  - In what areas do you think community pharmacy has made the biggest contributions to the healthcare response to COVID-19?
  - Do you think that there are any areas where community pharmacy could have been more actively involved or made a greater contribution during the healthcare response to COVID-19?
    - What would have been needed to facilitate this?
  - Can you tell me about any changes to your practice/services as a pharmacist that occurred as a result of the pandemic that you would like to see remain in place?  
(Prompt: Flu vaccination services, COVID-19 vaccination services, text alerts, change in methods of service delivery to maintain social distance e.g. video consultations, telephone calls and medicines pick up)
    - What would you **not** like to see remain in place?
  - What were your experiences of working with local healthcare professionals across the NHS during the pandemic?
    - How did they perceive community pharmacists?
    - Did relationships change? (If so, in what way?)
  - How do you think the pandemic will affect your working relationship with local healthcare professionals going forward?
  - How do you think healthcare professionals' expectations of community pharmacy could be managed in a future pandemic?
  - COVID-19-related information for pharmacists on a number of topics, i.e. clinical, business and financial matters, came from several different sources during the course of the pandemic, e.g. BSO website, HSCB e-mails, Department of Health letters, CPNI. What did you think about the COVID-19 information that was available to you? (Prompts: Quality, volume, frequency of distribution, evidence base, source)
    - What areas were covered well?
    - Was there anything in terms of information provision that could have been done differently?

- How helpful was the business support you received from professional bodies / government departments? [*may not be relevant to employee pharmacists*] (Prompt e.g. financial support, permission to change opening hours, temporary pharmaceutical register)
  - Did you receive the support that you needed? (If not, can you tell me more about this?)
  - What was good about the support you received?
  - *For employee pharmacists*: Were there any areas of support you felt were lacking for you as an employee pharmacist?
  
- How do you think community pharmacy could prepare for a future pandemic or health care crisis? (Prompts: Business continuity / staffing – cross sectoral working, Communication strategies, Advance disaster planning, Guidance for pharmacy contractors on how to manage during a pandemic, Training – community pharmacists + staff?, Training in locality – multidisciplinary? Modernising prescription medicines processes and structures)
  
- How much autonomy should there be for healthcare professionals such as community pharmacists to exercise their own professional judgement in the decisions or actions that they take during an emergency situation such as a pandemic? (Prompts: controlled drugs storage, emergency medicines legislation)
  
- What has been the single biggest learning point for you about your role as a community pharmacist from the pandemic so far?

### Closing the interview

*“That brings us to the end of the interview.*

*Is there anything else about community pharmacy and the ongoing COVID-19 pandemic that you feel has not been covered or that you would like to discuss before we finish up?*

*Do you have any additional comments you would like to make as to the content of the interview or how it went?*

*Thank you very much for making the time to speak with me today.”*

**[Turn the digital recorder off]**

## Appendix 1: Interview participant consent form



School of Pharmacy

Medical Biology Centre  
97 Lisburn Rd  
Belfast BT9 7BL  
Tel: 028 90972007  
Fax: 028 90247794

**INTERVIEW PARTICIPANT CONSENT FORM****STUDY ID** 

**Study Title: The community pharmacy workforce's preparedness for, and response to, the COVID-19 pandemic**

Please initial box

1. I confirm that I have read, or had read to me, and understand the information sheet dated 10/02/2021 (version 1.0) for the above study. I have had the opportunity to ask questions, and these have been answered fully.

2. I understand that my participation is completely voluntary and that I am free to withdraw at any time, without giving any reason and without my legal rights being affected.

3. I understand, and agree to, the interview being digitally audio recorded.

4. I understand that direct quotations from the interview may be used in reports and papers, but that confidentiality and anonymity will be maintained, and it will not be possible to identify me from any publications.

Community Pharmacists Interview

Topic Guide

Study ID 

5. I understand that the researcher may share the pseudonymised audio-recordings with a transcription company and that the company will destroy the recording as soon as the transcription has been checked.

6. I understand that what is discussed during the interview is confidential.

7. I understand that the study is being conducted by researchers from Queen's University Belfast and that my personal information (including consent forms) will be held securely on University premises (in the School of Pharmacy) and handled in accordance with the provisions of the General Data Protection Regulation (2018).

8. I agree to take part in the above study.



---

**Name of Participant**

---

**Date**

---

**Signature**

(Please print)

SUSAN PATTERSON

---

**Name of Researcher**

---

**Date**

---

**Signature**

(Please print)

***When completed: A signed copy of this form can be returned by e-mail to [susan.patterson@qub.ac.uk](mailto:susan.patterson@qub.ac.uk) or by post to Dr Susan Patterson, at the address above. Please retain a copy for your personal records.***

***Thank you for your participation in this research.***

A mixed methods study of the community pharmacy workforce's preparedness for, and response to, the COVID-19 pandemic

## OTHER KEY STAKEHOLDERS: INTERVIEW TOPIC GUIDE

### Introduction

*Hello, my name is Susan Patterson, and I am a researcher from the School of Pharmacy, Queen's University Belfast. Thank you very much for making the time to speak with me today.*

*Have you had a chance to read through the information sheet that was sent out to you? Would you like me to read you a short summary? Are there any questions that you would like to ask me before we start?"*

### Optional section to read if the participant hasn't read the information sheet

*"In this research project, we are interested in finding out about the community pharmacy workforce's preparedness for, and response to, the COVID-19 pandemic. In the first part of this project, we reviewed various documents relating to structural changes to community pharmacy practice (i.e. infrastructure, funding/resourcing, legislation, policies and guidelines) in Northern Ireland in preparation for and/or in response to the COVID-19 pandemic. In the second part, we contacted 130 community pharmacists in Northern Ireland by telephone and asked them to complete a short questionnaire about how they prepared for and responded to the COVID-19 pandemic. Now we are speaking to a range of key stakeholders to further explore perspectives and reflections on the community pharmacy workforce's preparedness for, and response to COVID-19, including lessons for future public health crises. We will be exploring the views and experiences of community pharmacists in more detail and will also be interviewing representatives of patients, the pharmacy and medical professions, policy makers and service commissioners."*

### Explaining what will happen in the interview and afterwards

*"I will be recording the interview on a digital recorder, to ensure that we have an accurate and detailed record of what you say. The recording will be saved on a password-protected computer and only those immediately involved in the research study and a transcriber (who will sign a confidentiality agreement) will be able to listen to it. The recording will be typed up word-for-word and any names, locations, or anything else that could identify you will be removed so that the information is anonymous. After we have conducted interviews with all of the other participants, we will analyse the information within the research team. The interview should last approximately 40 minutes. You are free to stop the interview and/or recording at any point. If there are any questions that you would prefer not to answer, just let me know and we can move on to the next question."*

## Consent

*“Before we start, I need to obtain your consent to ensure that you understand what the study involves; that anything you say will be kept completely confidential, that you will not be identified in any way, and also that you are happy for the interview to be recorded.”*

**If the interview is conducted in person:** *“Can you please read through the consent form and initial each box to indicate that you understand and agree with each statement? There are two copies: you will keep one of them and I will keep the other for our records.”*

**[Turn the digital recorder on]**

**[Consent form – see Appendix 1]**

**If the interview is conducted by telephone:** *“I will now read you a series of statements about the study which I would like you to respond to with either “Yes” or “No”. I will audio-record and note your responses on the consent form.”*

### Demographic information

*"I would like to start by asking you a few questions about yourself and I will note the answers on this form [show participant the demographic details form]. This form will help us describe who has taken part in this study, but you will not be identified in any way."*

[If it is a telephone interview, the text above will be amended to take account of this.]

#### 1. Can I confirm the gender you identify as?

Female

Male

Prefer not to disclose

Other (please specify)

Other: \_\_\_\_\_

#### 2. Which of the following categories includes your age?

&lt;25

25 - 34

35 - 44

45 - 54

55 - 64

≥65

#### 3. What is your occupation?

Administrative Pharmacy/ Doctor / Patient representative / Other please specify

\_\_\_\_\_

#### 4. How many years have you been working in your current role?

≤5

6 – 10

11 – 15

≥15



- 1  
2  
3  
4  
5  
6  
7  
8  
9  
10  
11  
12  
13  
14  
15  
16  
17  
18  
19  
20  
21  
22  
23  
24  
25  
26  
27  
28  
29  
30  
31  
32  
33  
34  
35  
36  
37  
38  
39  
40  
41  
42  
43  
44  
45  
46  
47  
48  
49  
50  
51  
52  
53  
54  
55  
56  
57  
58  
59  
60
- Focusing on your role as [*insert whatever their role is*], can you tell me about how you would sum up your experience of community pharmacy during the pandemic?
    - How prepared do you think community pharmacists were as the pandemic started?
    - Did your experience with community pharmacy change over time?
    - What worked well?
    - What worked less well?
  
  - In your current role, how has the nature of your interaction with community pharmacists changed as a result of the pandemic?
  
  - What do you think were the biggest challenges that community pharmacy has faced during the pandemic?  
(Prompts<sup>1</sup>: protection of pharmacy workforce, concerns about staff illness, staff isolation, risk of pharmacy closure, financial difficulties, essential medicines stock shortages, public panic, GP closure, provision of COVID advice)
  
  - In what areas do you think community pharmacy has made the biggest contributions to the healthcare response to COVID-19?
  
  - In what areas do you think community pharmacy could have been more actively involved or made a greater contribution during the healthcare response to COVID-19?
    - What would have been needed to facilitate this?
  
  - How do you think the role of the community pharmacist has changed as a result of the pandemic?
    - Do you view community pharmacists differently now compared to pre-pandemic? (If yes, why/can you tell me more about this?)
  
  - Can you tell me about any changes to community pharmacy services as a result of the pandemic that you would like to see remain in place?  
(Prompt: Flu vaccination services, COVID-19 vaccination services, text alerts, change in methods of service delivery to maintain social distance e.g. video consultations, telephone calls and medicines pick up)
    - What would you **not** like to see remain in place?

---

<sup>1</sup> The researcher will rephrase the question if necessary and not verbalise these as far as possible to avoid leading the interviewee

- 1  
2  
3  
4  
5  
6  
7  
8  
9  
10  
11  
12  
13  
14  
15  
16  
17  
18  
19  
20  
21  
22  
23  
24  
25  
26  
27  
28  
29  
30  
31  
32  
33  
34  
35  
36  
37  
38  
39  
40  
41  
42  
43  
44  
45  
46  
47  
48  
49  
50  
51  
52  
53  
54  
55  
56  
57  
58  
59  
60
- COVID-19-related information came from several different sources during the course of the pandemic. Can you tell me about the COVID-19 information that your organisation/department provided to community pharmacies? [*may not be relevant to everyone*] (Prompts: Quality, volume, frequency of distribution, evidence base, source)
    - Did your organisation coordinate information with other professional organisations?
    - What was good about the provision of information?
    - What could have been done differently with community pharmacies in respect of the provision of and the coordination of information?
  - How could community pharmacies have been utilised more to disseminate COVID-19 information to the public? (Prompts: infection control, symptoms and usual course of the disease, testing, contact tracing, seeking help)
    - What could have been done differently by community pharmacy to keep the public informed? (Prompt: about the disease and how to access their medicines)
  - How do you think healthcare professions such as community pharmacy should prepare for a future pandemic or health care crisis? (Prompts: Business continuity / staffing – cross sectoral working, Communication strategies, Advance disaster planning, Guidance for pharmacy contractors on how to manage during a pandemic, Training – community pharmacists + staff?, Training in locality – multidisciplinary? Modernising prescription medicines processes and structures)
  - How can we maintain the supply of medicines to make things run more efficiently if a pandemic were to happen again? [*may not be relevant to everyone*]
    - What needs to change? (Prompts: Prescription review, alignment of quantities on repeat prescriptions, electronic transfer of prescriptions, Dispensing Robots, medicines adherence technology?)
  - How much autonomy should there be for healthcare professionals such as community pharmacists to exercise their own professional judgement in the decisions or actions that they take during an emergency situation such as a pandemic? (Prompts: controlled drugs storage, emergency medicines legislation)
  - What do you think has been the biggest learning point for you in respect of community pharmacy from the pandemic so far?

### Closing the interview

*“That brings us to the end of the interview.*

*Is there anything else about community pharmacy and the ongoing COVID-19 pandemic that you feel has not been covered or that you would like to discuss before we finish up?*

*Do you have any additional comments you would like to make as to the content of the interview or how it went?*

*Thank you very much for making the time to speak with me today.”*

**[Turn the digital recorder off]**

## Appendix 1: Interview participant consent form

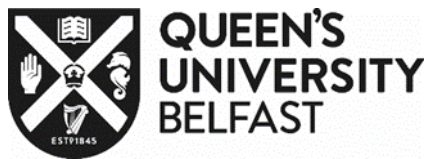

School of Pharmacy

Medical Biology Centre  
97 Lisburn Rd  
Belfast BT9 7BL  
Tel: 028 90972007  
Fax: 028 90247794

**INTERVIEW PARTICIPANT CONSENT FORM**STUDY ID 

**Study Title: The community pharmacy workforce's preparedness for, and response to, the COVID-19 pandemic**

Please initial box

1. I confirm that I have read, or had read to me, and understand the information sheet dated 10/02/2021 (version 1.0) for the above study. I have had the opportunity to ask questions, and these have been answered fully.

2. I understand that my participation is completely voluntary and that I am free to withdraw at any time, without giving any reason and without my legal rights being affected.

3. I understand, and agree to, the interview being digitally audio recorded.

4. I understand that direct quotations from the interview may be used in reports and papers, but that confidentiality and anonymity will be maintained, and it will not be possible to identify me from any publications.

1  
2  
3  
4  
5  
6  
7  
8  
9  
10  
11  
12  
13  
14  
15  
16  
17  
18  
19  
20  
21  
22  
23  
24  
25  
26  
27  
28  
29  
30  
31  
32  
33  
34  
35  
36  
37  
38  
39  
40  
41  
42  
43  
44  
45  
46  
47  
48  
49  
50  
51  
52  
53  
54  
55  
56  
57  
58  
59  
60

|                                  |             |                                                    |
|----------------------------------|-------------|----------------------------------------------------|
| Other Key Stakeholders Interview | Topic Guide | Study ID <input style="width: 80px;" type="text"/> |
|----------------------------------|-------------|----------------------------------------------------|

5. I understand that the researcher may share the pseudonymised audio-recordings with a transcription company for typing and that the company will destroy the recording as soon as the transcription has been checked.

6. I understand that what is discussed during the interview is confidential.

7. I understand that the study is being conducted by researchers from Queen’s University Belfast and that my personal information (including consent forms) will be held securely on University premises (in the School of Pharmacy) and handled in accordance with the provisions of the General Data Protection Regulation (2018).

8. I agree to take part in the above study.

|                            |             |                  |
|----------------------------|-------------|------------------|
| <b>Name of Participant</b> | <b>Date</b> | <b>Signature</b> |
| (Please print)             |             |                  |

SUSAN PATTERSON

|                           |             |                  |
|---------------------------|-------------|------------------|
| <b>Name of Researcher</b> | <b>Date</b> | <b>Signature</b> |
| (Please print)            |             |                  |

***When completed: A signed copy of this form can be returned by e-mail to [susan.patterson@qub.ac.uk](mailto:susan.patterson@qub.ac.uk) or by post to Dr Susan Patterson, at the address above. Please retain a copy for your personal records.***

***Thank you for your participation in this research.***

## COREQ (COnsolidated criteria for REporting Qualitative research) Checklist

A checklist of items that should be included in reports of qualitative research. You must report the page number in your manuscript where you consider each of the items listed in this checklist. If you have not included this information, either revise your manuscript accordingly before submitting or note N/A.

| Topic                                          | Item No. | Guide Questions/Description                                                                                                                              | Reported on Page No. |
|------------------------------------------------|----------|----------------------------------------------------------------------------------------------------------------------------------------------------------|----------------------|
| <b>Domain 1: Research team and reflexivity</b> |          |                                                                                                                                                          |                      |
| <i>Personal characteristics</i>                |          |                                                                                                                                                          |                      |
| Interviewer/facilitator                        | 1        | Which author/s conducted the interview or focus group?                                                                                                   |                      |
| Credentials                                    | 2        | What were the researcher's credentials? E.g. PhD, MD                                                                                                     |                      |
| Occupation                                     | 3        | What was their occupation at the time of the study?                                                                                                      |                      |
| Gender                                         | 4        | Was the researcher male or female?                                                                                                                       |                      |
| Experience and training                        | 5        | What experience or training did the researcher have?                                                                                                     |                      |
| <i>Relationship with participants</i>          |          |                                                                                                                                                          |                      |
| Relationship established                       | 6        | Was a relationship established prior to study commencement?                                                                                              |                      |
| Participant knowledge of the interviewer       | 7        | What did the participants know about the researcher? e.g. personal goals, reasons for doing the research                                                 |                      |
| Interviewer characteristics                    | 8        | What characteristics were reported about the interviewer/facilitator? e.g. Bias, assumptions, reasons and interests in the research topic                |                      |
| <b>Domain 2: Study design</b>                  |          |                                                                                                                                                          |                      |
| <i>Theoretical framework</i>                   |          |                                                                                                                                                          |                      |
| Methodological orientation and Theory          | 9        | What methodological orientation was stated to underpin the study? e.g. grounded theory, discourse analysis, ethnography, phenomenology, content analysis |                      |
| <i>Participant selection</i>                   |          |                                                                                                                                                          |                      |
| Sampling                                       | 10       | How were participants selected? e.g. purposive, convenience, consecutive, snowball                                                                       |                      |
| Method of approach                             | 11       | How were participants approached? e.g. face-to-face, telephone, mail, email                                                                              |                      |
| Sample size                                    | 12       | How many participants were in the study?                                                                                                                 |                      |
| Non-participation                              | 13       | How many people refused to participate or dropped out? Reasons?                                                                                          |                      |
| <i>Setting</i>                                 |          |                                                                                                                                                          |                      |
| Setting of data collection                     | 14       | Where was the data collected? e.g. home, clinic, workplace                                                                                               |                      |
| Presence of non-participants                   | 15       | Was anyone else present besides the participants and researchers?                                                                                        |                      |
| Description of sample                          | 16       | What are the important characteristics of the sample? e.g. demographic data, date                                                                        |                      |
| <i>Data collection</i>                         |          |                                                                                                                                                          |                      |
| Interview guide                                | 17       | Were questions, prompts, guides provided by the authors? Was it pilot tested?                                                                            |                      |
| Repeat interviews                              | 18       | Were repeat interviews carried out? If yes, how many?                                                                                                    |                      |
| Audio/visual recording                         | 19       | Did the research use audio or visual recording to collect the data?                                                                                      |                      |
| Field notes                                    | 20       | Were field notes made during and/or after the interview or focus group?                                                                                  |                      |
| Duration                                       | 21       | What was the duration of the interviews or focus group?                                                                                                  |                      |
| Data saturation                                | 22       | Was data saturation discussed?                                                                                                                           |                      |
| Transcripts returned                           | 23       | Were transcripts returned to participants for comment and/or                                                                                             |                      |

| Topic                                  | Item No. | Guide Questions/Description                                                                                                        | Reported on Page No. |
|----------------------------------------|----------|------------------------------------------------------------------------------------------------------------------------------------|----------------------|
|                                        |          | correction?                                                                                                                        |                      |
| <b>Domain 3: analysis and findings</b> |          |                                                                                                                                    |                      |
| <i>Data analysis</i>                   |          |                                                                                                                                    |                      |
| Number of data coders                  | 24       | How many data coders coded the data?                                                                                               |                      |
| Description of the coding tree         | 25       | Did authors provide a description of the coding tree?                                                                              |                      |
| Derivation of themes                   | 26       | Were themes identified in advance or derived from the data?                                                                        |                      |
| Software                               | 27       | What software, if applicable, was used to manage the data?                                                                         |                      |
| Participant checking                   | 28       | Did participants provide feedback on the findings?                                                                                 |                      |
| <i>Reporting</i>                       |          |                                                                                                                                    |                      |
| Quotations presented                   | 29       | Were participant quotations presented to illustrate the themes/findings?<br>Was each quotation identified? e.g. participant number |                      |
| Data and findings consistent           | 30       | Was there consistency between the data presented and the findings?                                                                 |                      |
| Clarity of major themes                | 31       | Were major themes clearly presented in the findings?                                                                               |                      |
| Clarity of minor themes                | 32       | Is there a description of diverse cases or discussion of minor themes?                                                             |                      |

Developed from: Tong A, Sainsbury P, Craig J. Consolidated criteria for reporting qualitative research (COREQ): a 32-item checklist for interviews and focus groups. *International Journal for Quality in Health Care*. 2007. Volume 19, Number 6: pp. 349 – 357

**Once you have completed this checklist, please save a copy and upload it as part of your submission. DO NOT include this checklist as part of the main manuscript document. It must be uploaded as a separate file.**
